# Supplementary material
Source: PubMed Central journal article supplement (PMC7429746)
Supplement: EMBJ-39-e104324-s001.pdf [file EMBJ-39-e104324-s001.pdf]

# Transient exposure to miR-203 expands the differentiation capacity of pluripotent stem cells

By Salazar-Roa et al.

## List of Appendix Material

### Appendix Figures

[Appendix Figure S1](#). Effect of transient exposure to miR-203 in embryoid body formation.

[Appendix Figure S2](#). Effect of a transient exogenous expression of miR-203 in PSCs cultured in 2i/L conditions.

[Appendix Figure S3](#). Transient exposure to miR-203 induces 2-cell-like markers.

[Appendix Figure S4](#). Differentiation properties in teratomas generated from *mii*PSCs.

[Appendix Figure S5](#). Transient exposure to miR-203 in vitro improves the in vivo developmental potential of iPSCs and ESCs in chimera assays.

[Appendix Figure S6](#). Human *mii*PSCs efficiently contribute to chimerism in 8C-stage mouse embryos (15 human cell injected).

[Appendix Figure S7](#). Human *mii*PSCs efficiently contribute to chimerism in post-implantation mouse conceptuses (15 human cell injected).

[Appendix Figure S8](#). DNA methyltransferases 3a and 3b are miR-203 targets involved in its induction of the 2C-like stage.

[Appendix Figure S9](#). Common genes up-regulated and hypomethylated in *mii*PSC 20 days after Dox withdrawal.

[Appendix Figure S10](#). Improved embryoid body formation after transient exogenous expression of miR-203a-3p versus miR-203a-5p.

### Appendix Tables

[Appendix Table S1](#). Gene Ontology Analysis of genes significantly deregulated in *mii*PSC-derived teratomas vs. un-induced iPSC-derived teratomas.

[Appendix Table S2](#). List of miR-203 predicted targets among the transcripts downregulated in *mii*PSCs and involved in the epigenetic regulation of gene expression (GO0040029).

[Appendix Table S3](#). Antibodies used in this work.

[Appendix Table S4](#). Oligonucleotides used in this work.

[Appendix Table S5](#). List of genes transcriptionally induced with differentially methylated regions (DMRs) in their promoter regions.

[Appendix Table S6](#). Gene Ontology Analysis of genes up-regulated and hypomethylated in *mii*PSCs versus control PSCs.

## Appendix Figures

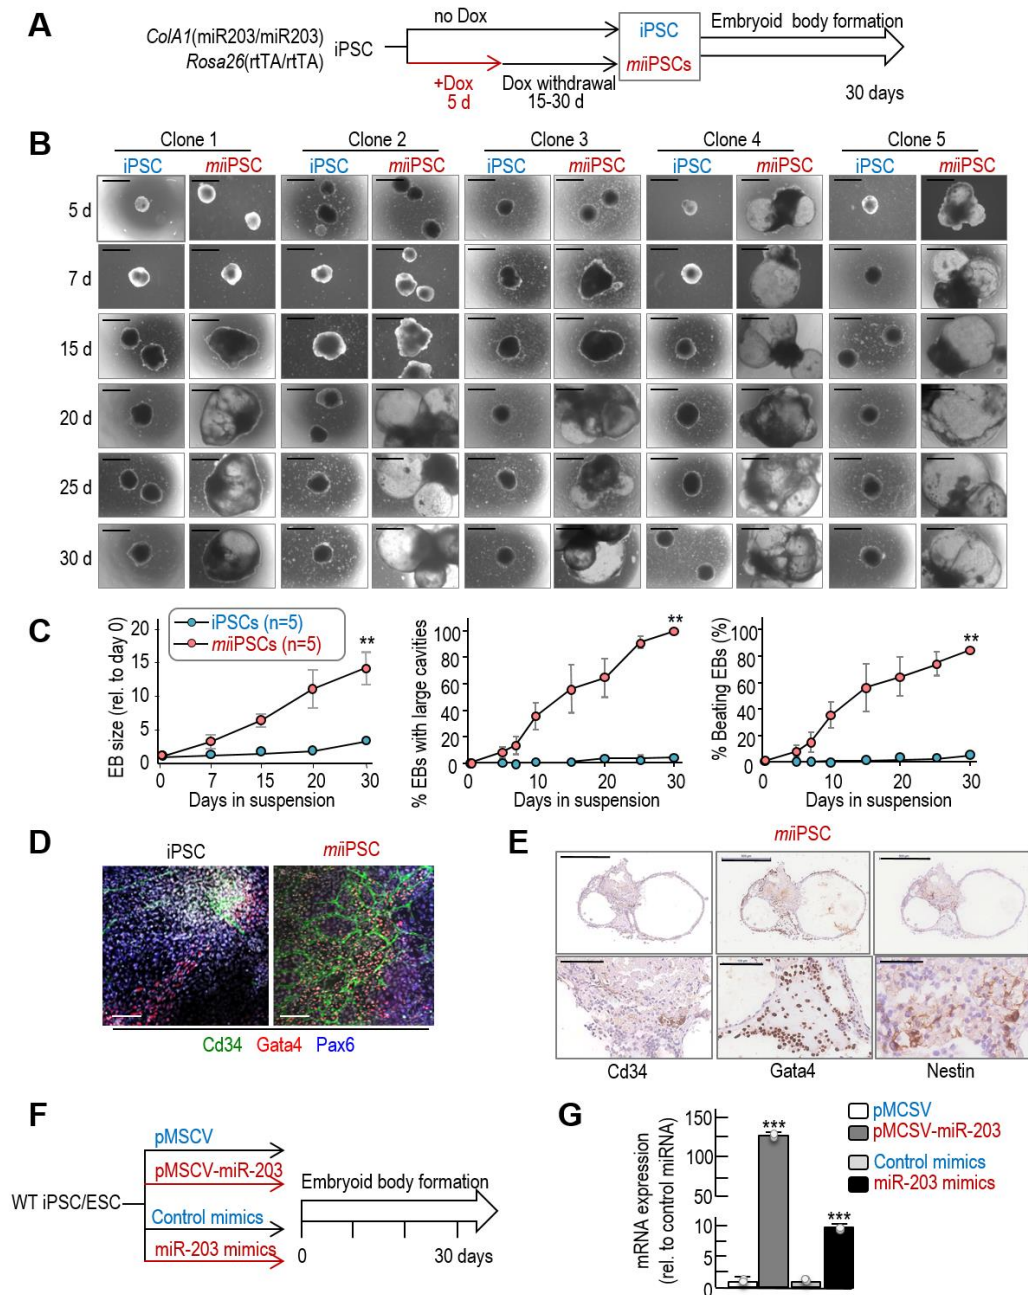

**Appendix Figure S1. Effect of transient exposure to miR-203 in embryoid body formation.** **A**, Experimental design to generate embryoid bodies (EBs) from wild-type iPSCs or *miIPSCs*. Cells were treated or not with Dox during 5 days and Dox was then removed during the following 15-30 days before starting the embryoid body formation assays. **B**, Representative images of embryoid bodies derived from 5 independent clones of un-induced iPSCs or *miIPSCs* at different time points of the differentiation process. Please note that Clone 4 has been chosen as a representative clone in Fig. 1F. This clone is reproduced here for better comparison among clones. Scale bar, 500  $\mu$ m. **C**, Quantification of EB size from panel **B**, and percentage of EBs with internal large cavities or beating EBs during the differentiation process. Data are mean  $\pm$  s.e.m. ( $n=5$  independent experiments).  $**P<0.01$  (Student's *t*-test). **D**, Representative immunofluorescence detection of Cd34 (mesoderm; green), Gata4 (endoderm; red) and Pax6 (ectoderm; blue) in EBs derived from wild-type iPSCs or *miIPSCs*. Scale bar, 20  $\mu$ m. **E**, Immunohistochemical detection of Cd34 (mesoderm), Gata4 (endoderm) and Nestin (ectoderm) in *miIPSC*-derived EBs. Scale

bars are 500  $\mu\text{m}$  for the upper images and 100  $\mu\text{m}$  (Cd34, Gata4) or 50  $\mu\text{m}$  (Nestin) for the lower images. **F**, Schematic representation of the experimental design used to generate embryoid bodies (EBs) from wild-type iPSCs or ESCs, either transduced with retroviruses or transfected with miRNA mimics for transient expression of miR-203. **G**, miR-203 RNA expression in wild-type iPSCs transduced with pMCSV or pMCSV-miR-203, or transfected with control mimics or miR-203 mimics. RNA expression is normalized by a control miRNA (miR-142). Data are mean  $\pm$  s.e.m. (n=3 independent experiments) \*\*\* $P < 0.001$  (Student's t-test).

**A**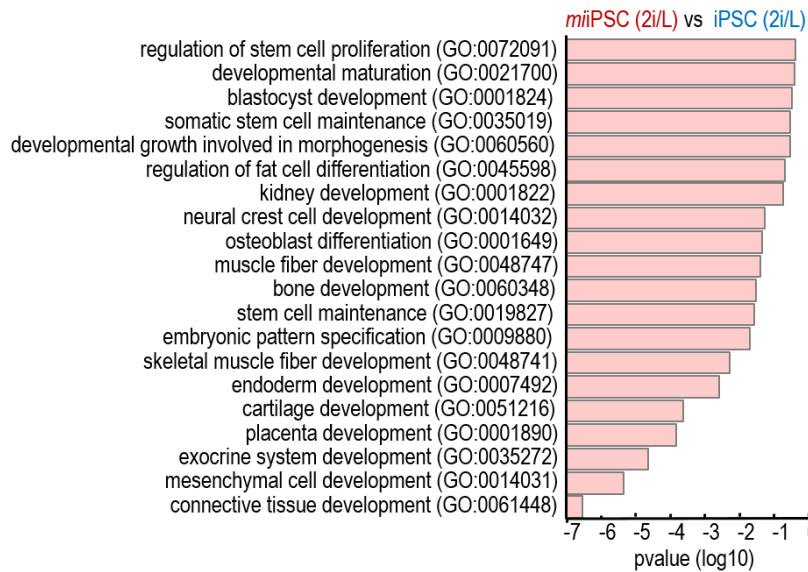**B**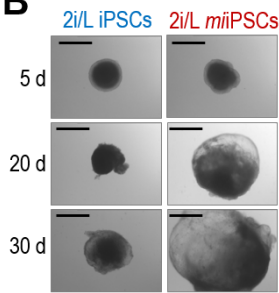**C**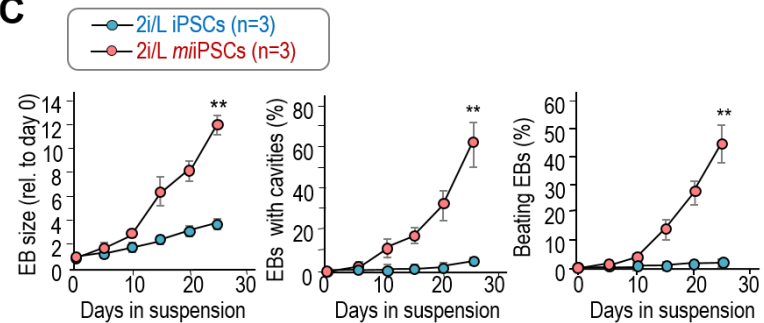

**Appendix Figure S2. Effect of a transient exogenous expression of miR-203 in PSCs cultured in 2i/L conditions.** **A**, Pathways from the Gene Ontology Database significantly deregulated in *miiPSCs* versus un-induced iPSC, both cultured on 2i/L conditions. **B**, Representative images of EBs derived from un-induced iPSCs or *miiPSCs*, cultured in 2i/L conditions during 10 passages, at different time points of the differentiation process. Micrographs are representative of three different experiments. Scale bars, 500  $\mu$ m. **C**, Quantification of EBs size and the percentage of EBs presenting internal large cavities or beating from panel **B**. Data are mean  $\pm$  s.e.m. (n=3 independent experiments). \*\* $P < 0.01$  (Student's t-test).

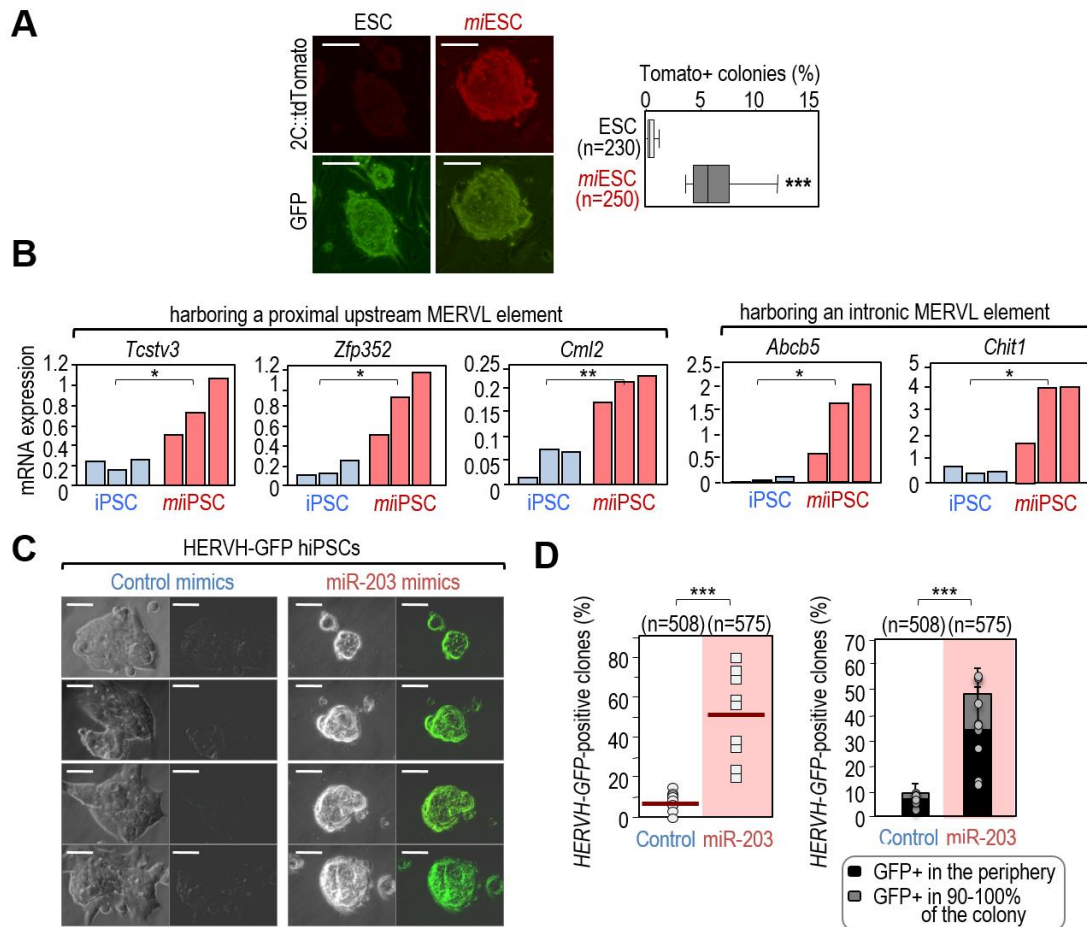

**Appendix Figure S3. Transient exposure to miR-203 induces 2-cell-like markers.** **A**, Representative immunofluorescence analysis of ESC colonies stably expressing the *2C::tdTomato* reporter, and transiently transduced with GFP (ESC) or miR-203-GFP (*miESC*) viruses. Scale bar, 10  $\mu$ m. Right plot shows the percentage of tdTomato-positive colonies out of the total GFP-positive colonies, 24 h after transduction. Data are represented as mean  $\pm$  s.e.m. (n=3 independent experiments). \*\*\* $P$ <0.001 (Student's *t*-test). **B**, Early RNA expression as determined by RNA sequencing (RPKM) of the indicated transcripts, known to be harboring a proximal upstream MERVL element (*Tcstv3*, *Zfp352* and *Cml2*) or an intronic MERVL element (*Abcb5* and *Chit1*). Data show three independent wild-type iPSC (blue) or *miPSC*s (red) clones. \* $P$ <0.05; \*\* $P$ <0.01 (Student's *t*-test). **C**, Representative images of human pluripotent stem cells (hiPSCs) expressing a long terminal repeat (LTR7) of HERVH endogenous retrovirus tagged by GFP. Cells were transfected with either control (left) or miR-203 mimics (right). White field and GFP expression for the same colonies are shown. Scale bars, 10  $\mu$ m. **D**, Left plot shows the percentage of HERVH-GFP-positive colonies in the assay described in panel **C**, five days after the miRNA transfection. Right plot shows the percentage of HERVH-GFP-positive colonies in which GFP is expressed only in the periphery of the clone (black) or in the majority of the cells constituting the colony (grey). Data are mean  $\pm$  s.e.m. (n=3 independent experiments; as indicated, 508 colonies for control mimics and 575 colonies for miR-203 mimics were counted). \*\*\* $P$ <0.001 (Student's *t*-test).



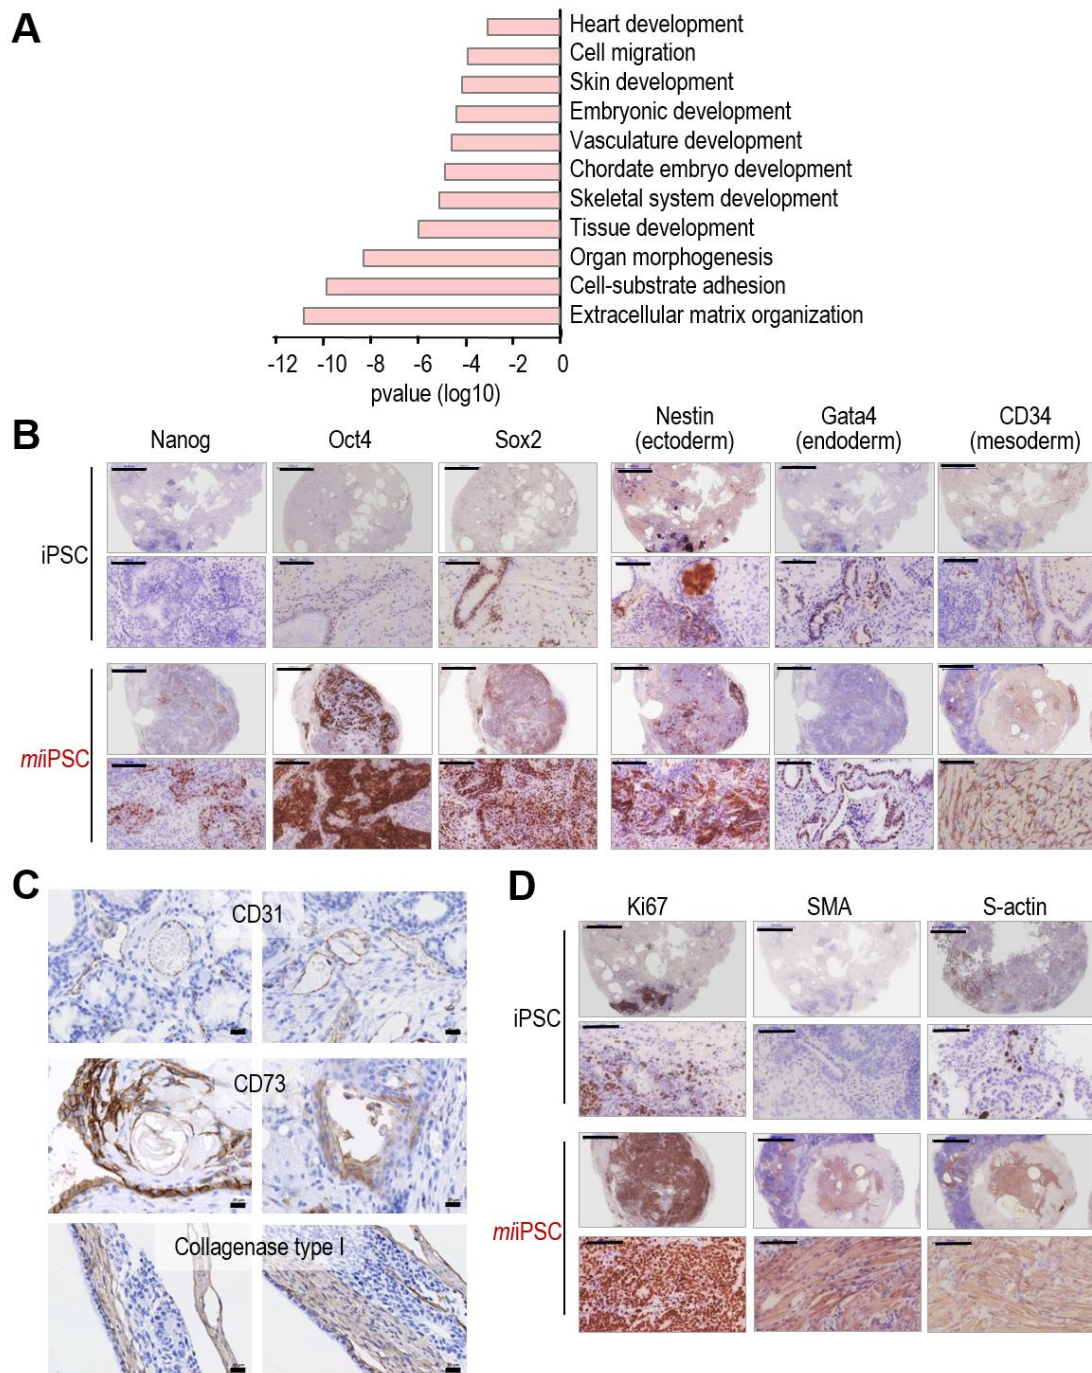

**Appendix Figure S4. Differentiation properties in teratomas generated from *miiPSCs*.** **A**, Gene Ontology Analysis of genes significantly altered in *miiPSC*-derived teratomas compared to teratomas derived from un-induced iPSCs. See Supplementary Table 2 for details. **B**, Immunohistochemical detection of pluripotency markers (Nanog, Oct4, Sox2), and markers of differentiation to the three germ layers (Nestin, Gata4, CD34) in teratomas derived from un-induced iPSCs or *miiPSCs*. Scale bars, 500  $\mu$ m and 100  $\mu$ m for higher magnifications. **C**, Immunodetection of CD31 (bone marrow), CD73 (pancreas) and collagenase type I (cartilage) in teratomas generated from *miiPSCs*. Scale bars, 20  $\mu$ m. **D**, Immunohistochemical analysis of teratomas derived from wild-type iPSCs or *miiPSCs*. Antibodies against the proliferation marker Ki67 or terminal differentiation to smooth muscle actin (SMA) or skeletal muscle actin (S-actin) were used. Scale bars, 500  $\mu$ m and 100  $\mu$ m for higher magnifications.

| Formation of chimeras                                  |               |                         |              |                        |
|--------------------------------------------------------|---------------|-------------------------|--------------|------------------------|
| Cells                                                  | iPSC<br>(n=2) | <i>mi</i> iPSC<br>(n=2) | ESC<br>(n=2) | <i>mi</i> ESC<br>(n=2) |
| Transferred embryos                                    | 135           | 137                     | 68           | 69                     |
| Chimeras/born pups                                     | 2/4           | 8/10                    | 8/12         | 19/19                  |
| Chimerism efficiency                                   | 50%           | 80%                     | 67%          | 100%                   |
| Adult chimeras with G.T.<br>(mice with 100% chimerism) | 1 (0)         | 5 (2)                   | 1 (1)        | 10 (7)                 |

**Appendix Figure S5. Transient exposure to miR-203 in vitro improves the in vivo developmental potential of iPSCs and ESCs in chimera assays.** Table showing the frequency of chimeric contribution exhibited by un-induced iPSCs and ESCs or *mi*iPSCs and *mi*ESCs previously exposed to miR-203 (2 independent clones were analyzed per condition).

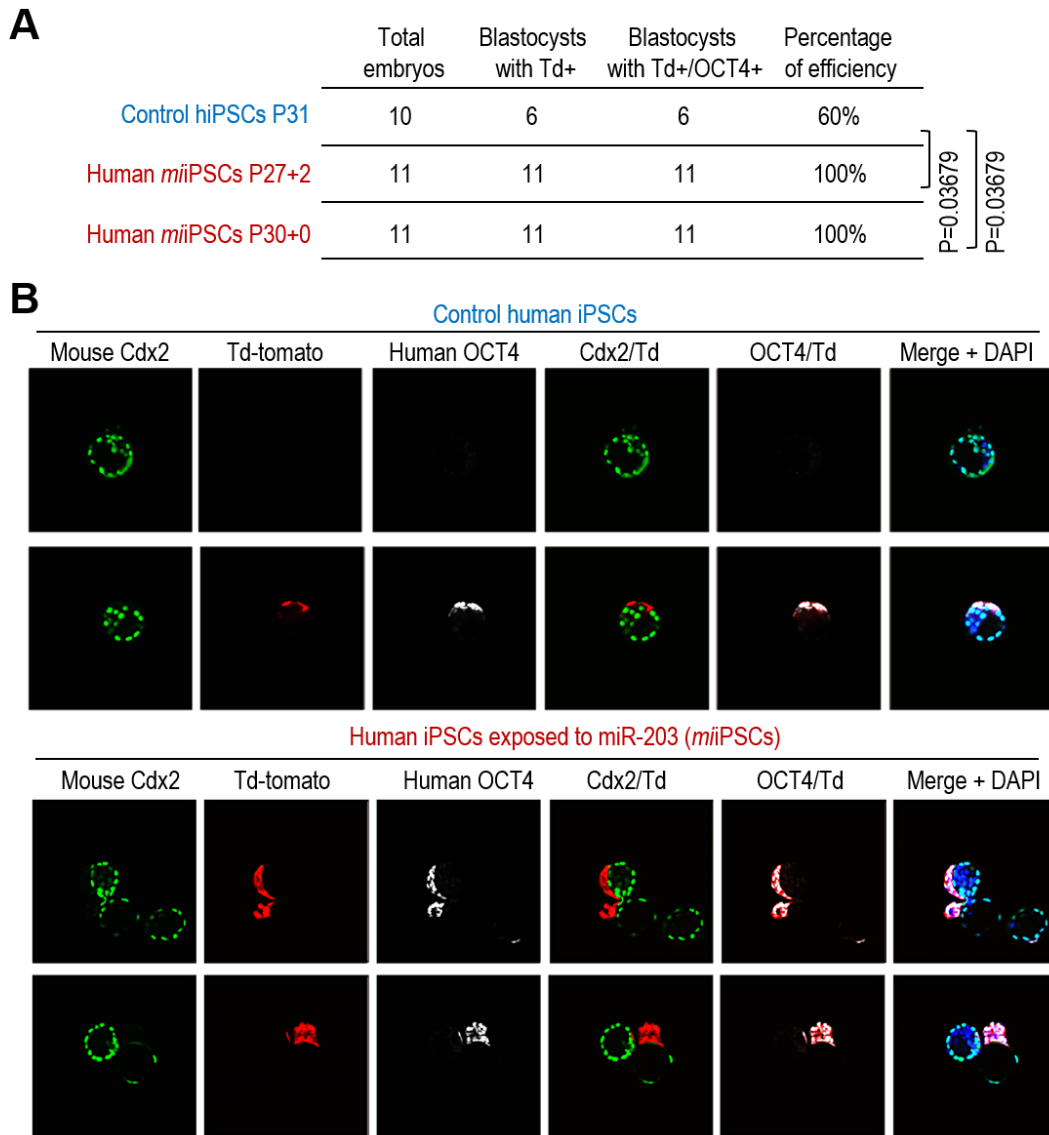

**Appendix Figure S6. Human *mii*PSCs efficiently contribute to chimerism in 8C-stage mouse embryos (15 human cell injected).** **A**, Summary of chimera assays in which 15 Td-Tomato fluorescent-labeled human iPSCs, either control or transiently transfected with miR-203-expressing vectors (*mii*PSCs) were injected into 8C-stage mouse embryos and their contribution analyzed 48-60 h later. **B**, Representative images showing the contribution of human control iPSCs or *mii*PSCs cells to mouse blastocysts. These structures were co-immunostained with (human) anti-OCT4 and (human/mouse) anti-Cdx2 antibodies. Td-Tomato, red; Scale bars, 20  $\mu$ m.



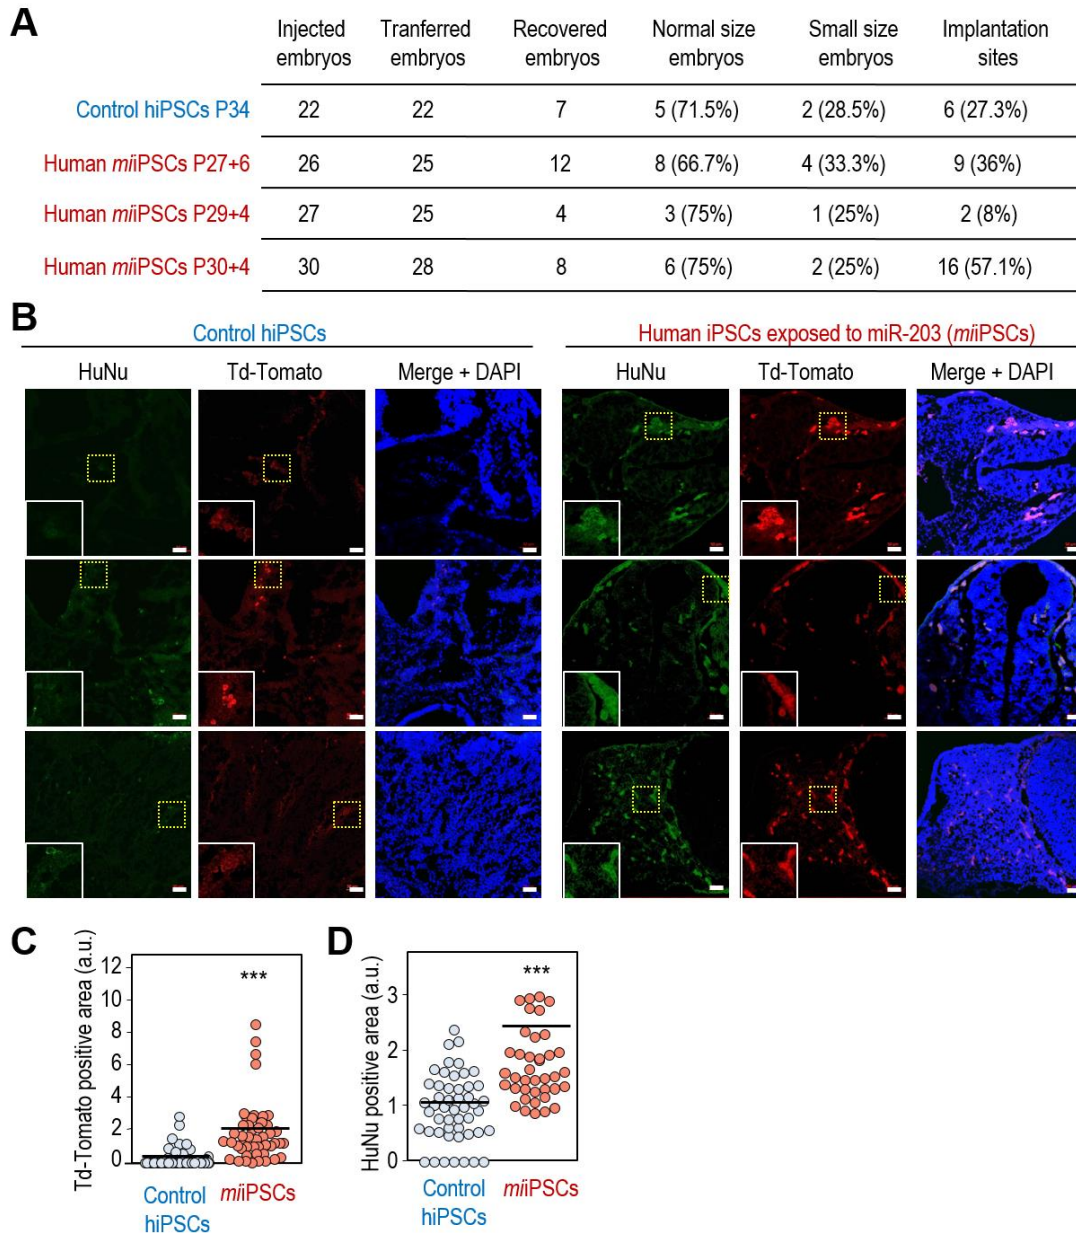

**Appendix Figure S7. Human *mii*PSCs efficiently contribute to chimerism in post-implantation mouse conceptuses (15 human cell injected).** **A**, Summary of interspecies chimera assays in which 15 Td-Tomato fluorescent-labeled human iPSCs, either control or transiently transfected with miR-203-expressing vectors (*mii*PSCs), were injected into 8C-stage mouse embryos. These embryos were cultured in vitro for 48 h to reach the blastocyst stage and then transfected to 2.5 day post coitum pseudo-pregnant females. The post-implantation mouse conceptuses were dissected at the E10.5 developmental stage and analyzed by immunofluorescence. **B**, Interspecies chimera assays in which 8C-stage mouse embryos were injected with 15 human iPSCs, cultured in vitro for 48 h to reach the blastocyst stage and then transfected to 2.5 day post coitum pseudo-pregnant females. The post-implantation mouse conceptuses were dissected at the E10.5 developmental stage and analyzed by immunofluorescence. Representative images showing the integration of control human iPSCs (left) or *mii*PSCs (right) into mouse E10.5 embryos. Anti-human HuNu antibody was co-stained with Td-Tomato direct fluorescence to detect human cells in E10.5 mouse embryos. The insets are enlargements of the yellow boxes. Scale bars, 50  $\mu$ m. **C,D**, Quantification of the Td-Tomato- (**C**) or HuNu- (**D**) positive area in 40-50 different cryosections of these embryos randomly and blindly selected for IF analysis. \*\*\* $P < 0.001$  (Student's t-test).

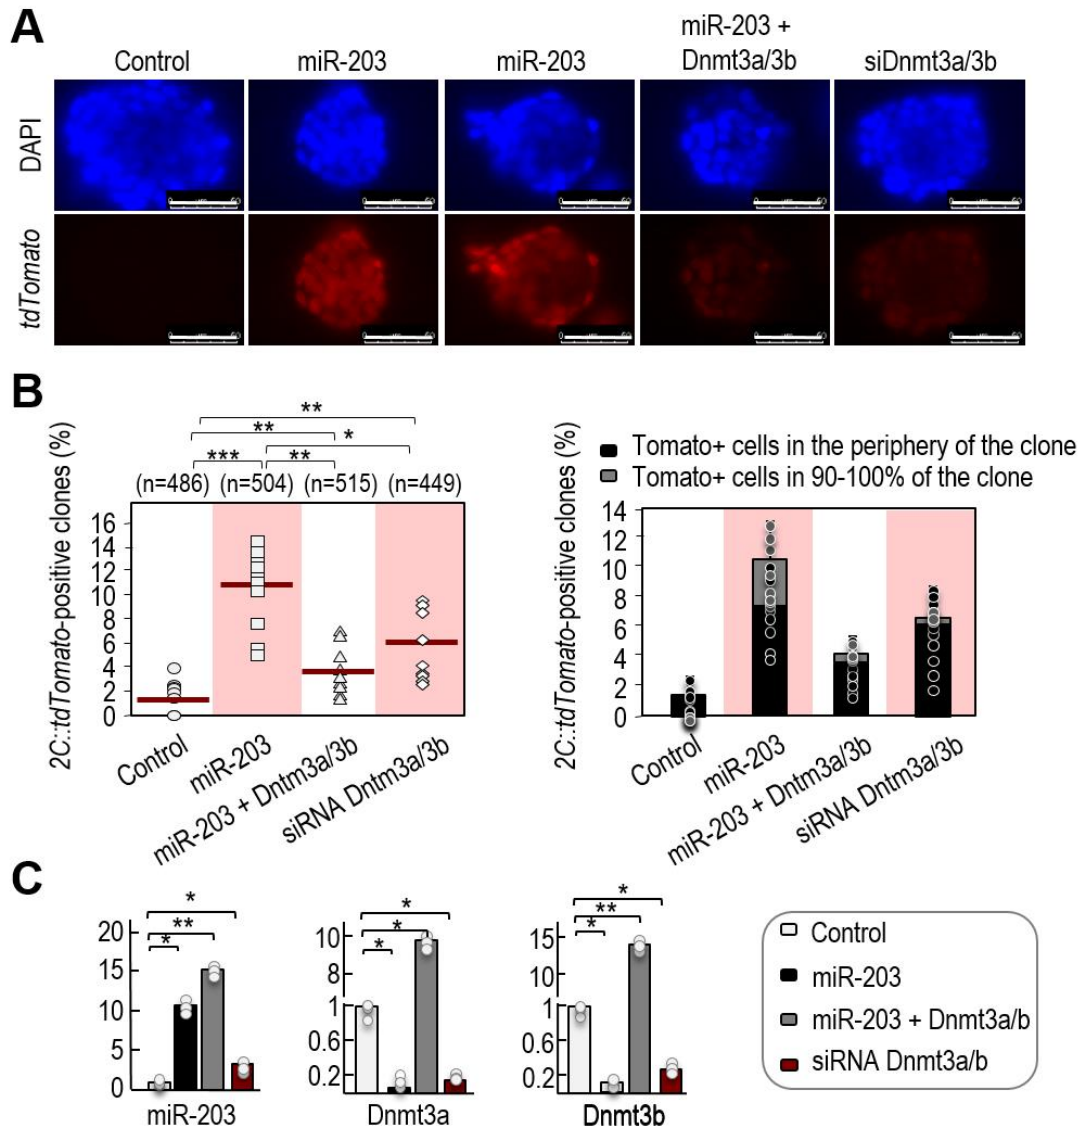

**Appendix Figure S8. DNA methyltransferases 3a and 3b are miR-203 targets involved in its induction of the 2C-like stage.** **A**, Detection of tdTomato and DAPI in ESCs stably expressing the *2C::tdTomato* reporter, and transiently transfected with either control mimics, miR-203 mimics, miR-203 mimics + Dnmt3a and Dnmt3b cDNAs or siRNA against both *Dnmt3a* and *Dnmt3b* transcripts. Scale bar, 50  $\mu$ m. **B**, The left histogram shows the percentage of Tomato-positive cells in the assays in panel **A** five days after transfection. The right histogram shows the percentage of Tomato-positive colonies in which Tomato is expressed only in the periphery of the clone (black) or in the majority of the cells constituting the colony (grey). Data are mean  $\pm$  s.e.m. ( $n=3$  independent experiments; 486 colonies for control mimics, 504 colonies for miR-203 mimics, 515 colonies for miR-203 mimics + Dnmt3a/3b cDNA and 449 colonies for *Dnmt3a/3b* siRNAs). **C**, miR-203, *Dnmt3a* and *Dnmt3b* transcript expression in *2C::tdTomato* ESCs transiently transfected as indicated in **A**. RNA expression was measured 24 hours after the transfection protocols and was normalized by a control miRNA (miR-142) or GAPDH mRNA, respectively. Data are mean  $\pm$  s.e.m. ( $n=3$  independent experiments) \* $P<0.05$ ; \*\* $P<0.01$ ; \*\*\* $P<0.001$  (Student's t-test).

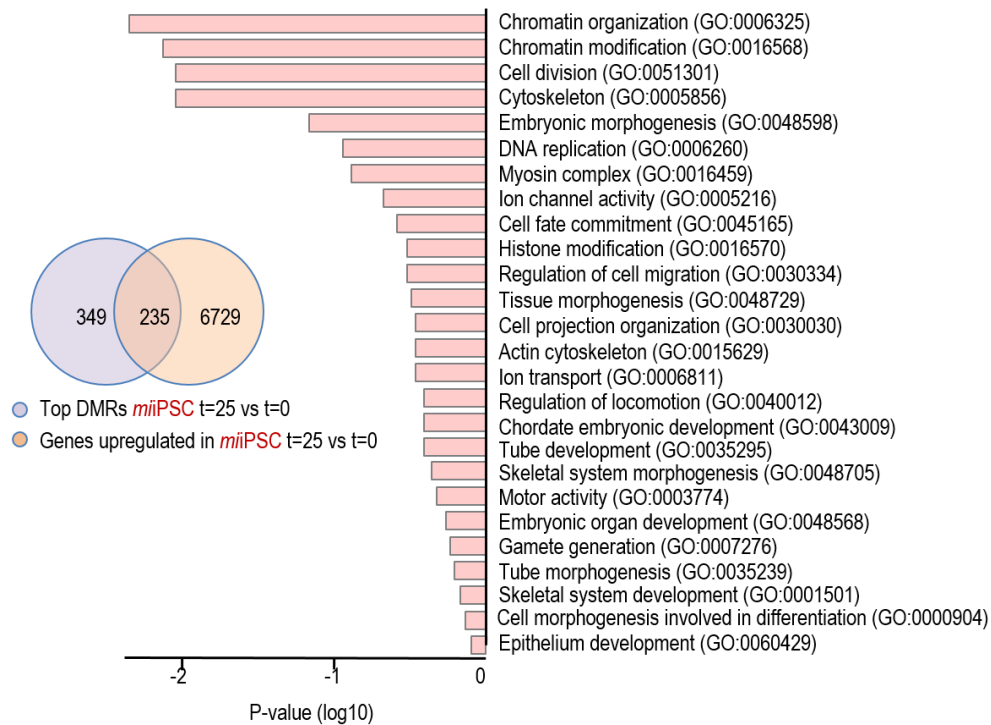

**Appendix Figure S9. Common genes up-regulated and hypomethylated in *miPSC* 20 days after Dox withdrawal.** Venn Diagrams representing the common genes up-regulated (data from RNA seq studies) and hypomethylated (data from genome-wide methylation studies) in *miPSC* 20 days after Dox withdrawal. A total of 235 genes ([Appendix Table S5](#)) were both DNA-hypomethylated and up-regulated in such conditions. Gene Ontology Analysis of this list is presented in the right panel and extended in [Appendix Table S6](#).

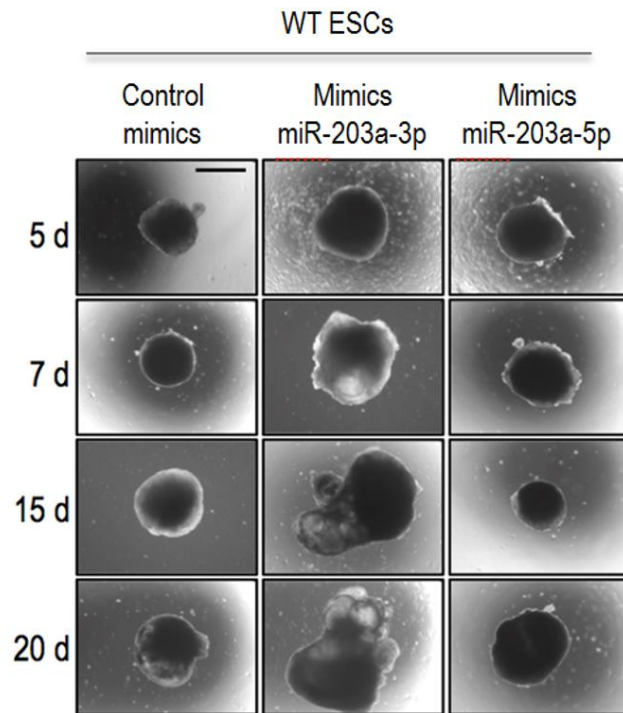

**Appendix Figure S10. Improved embryoid body formation after transient exogenous expression of miR-203a-3p versus miR-203a-5p.** Representative images of EBs derived from wild-type ESCs transfected with control mimics, miR-203a-3p or miR-203a-5p mimics, at different time points during the differentiation process. Scale bars, 500  $\mu$ m.

## Appendix Tables

**Appendix Table S1 | Gene Ontology Analysis of genes significantly deregulated in miPSC-derived teratomas vs. un-induced iPSC-derived teratomas.**

| Gene Ontology                                                      | log10 (p-value) | Transcripts                                                                                                                                                                                                                                                                                                                                                                                             |
|--------------------------------------------------------------------|-----------------|---------------------------------------------------------------------------------------------------------------------------------------------------------------------------------------------------------------------------------------------------------------------------------------------------------------------------------------------------------------------------------------------------------|
| Extracellular matrix organization (GO:0030198)                     | -10.9           | <i>Col1a1, Nid1, Col5a1, Postn, Lox, Col3a1, Lamc1, Nepn, Col1a2, Fn1, Serpinh1, Hspg2, Cyr61, Adamts2, Col11a1, Col5a2, Foxf1a, Itga8, Klf4, Pdgfra, Vmo1</i>                                                                                                                                                                                                                                          |
| Cell-substrate adhesion (GO:0031589)                               | -10.0           | <i>Col1a1, Nid1, Thbs1, Col3a1, Lamc1, Ctgf, Fn1, Sox17, Tek, Cyr61, Fbln2, Itgbl1, Klf4, Nid2, Rell2</i>                                                                                                                                                                                                                                                                                               |
| Organ morphogenesis (GO:0009887)                                   | -8.4            | <i>Col1a1, Igf2, Lama1, Thbs1, Col5a1, Hand1, Afp, Gata4, Myl3, Ctgf, Fst, Col4a2, Col1a2, Phlda2, Figf, Snai1, Tgfbr3, Hand2, Shank3, Sox17, Tek, Mybpc3, Hspg2, Cyr61, Enpep, Cited1, Edn1, Actc1, Ahsg, Alx3, Ang, Bmp4, Ccl2, Cfc1, Col11a1, Col5a2, Cryaa, Crygs, Fgf3, Flt1, Foxf1a, Ghr, Hoxa13, Hoxc11, Hoxd9, Itga4, Itga8, Klf4, Mmp2, Msx2, Myh6, Myl2, Pdgfra, Rbp4, Tbx20, Tbx2r, Wnt6</i> |
| Cell adhesion (GO:0007155)                                         | -7.4            | <i>Col1a1, Lama1, Nid1, Thbs1, Col5a1, Postn, Col3a1, Lamc1, Ctgf, Svep1, Wisp1, Fn1, Pcdh11x, Sox17, Spon2, Tek, Mybpc3, Hspg2, Cyr61, Col12a1, Lamc3, Podxl, Adam12, B4galnt2, Cdh3, Cntnap1, Cntnap5b, Col11a1, Col6a1, Col9a1, Dpp4, Fbln2, Hapln1, Igsf9b, Itga4, Itga8, Itgbl1, Kcp, Klf4, Ncan, Nid2, Pcdh10, Pcdh19, Rell2, Vnn1</i>                                                            |
| Tissue development (GO:0009888)                                    | -6.1            | <i>Col1a1, Lama1, Col5a1, Gata6, Postn, Hand1, Col3a1, Gata4, Myl3, Ctgf, Fst, Col1a2, Snai1, Pth1r, Tgfbr3, Hand2, Igfbp1, Shank3, Sox17, Mybpc3, Cyp26a1, Hspg2, Adamts2, Edn1, Actc1, Ahsg, Bmp4, Cdkn2a, Cfc1, Col11a1, Col5a2, Col9a1, Crygs, Foxf1a, Ghr, Ghsr, Hoxd9, Klf4, Myh6, Myl2, Ntf3, Pitx1, Pln, Rbp4, Sprr2k, Sprr4, Srpk3, Tcf23, Trpv1, Unc45b, Upk3a</i>                            |
| Embryonic skeletal system development (GO:0048706)                 | -5.4            | <i>Col1a1, Hspg2, Alx3, Col11a1, Hoxb9, Hoxd9, Klf4, Pcsk5, Rbp4</i>                                                                                                                                                                                                                                                                                                                                    |
| Skeletal system development (GO:0001501)                           | -5.1            | <i>Col1a1, Igf2, Col3a1, Ctgf, Col1a2, Pth1r, Hspg2, Edn1, Ahsg, Alx3, Bmp4, Casr, Col11a1, Col5a2, Col9a1, Ghr, Hoxb9, Hoxc11, Hoxd9, Klf4, Mmp2, Nppc, Pcsk5, Pdgfra, Pitx1, Rbp4, Twist2</i>                                                                                                                                                                                                         |
| Chordate embryonic development (GO:0043009)                        | -4.9            | <i>Col1a1, Gata6, Hand1, Gata4, Tgfbr3, Hand2, Sox17, Hspg2, Cited1, Edn1, Serpina1b, Cdx2, Alx3, Apba1, Bmp4, Col11a1, Dab2, Foxf1a, Hoxb9, Hoxd9, Ins13, Klf1, Klf4, Myh6, Pcsk5, Pdgfra, Rbp4</i>                                                                                                                                                                                                    |
| Embryonic development ending in birth or egg hatching (GO:0009792) | -4.8            | <i>Col1a1, Gata6, Hand1, Gata4, Tgfbr3, Hand2, Sox17, Hspg2, Cited1, Edn1, Serpina1b, Cdx2, Alx3, Apba1, Bmp4, Col11a1, Dab2, Evx1, Foxf1a, Hoxb9, Hoxd9, Ins13, Klf1, Klf4, Myh6, Pcsk5, Pdgfra, Rbp4</i>                                                                                                                                                                                              |
| Blood vessel development (GO:0001568)                              | -4.7            | <i>Col1a1, Thbs1, Col5a1, Hand1, Lox, Col3a1, Ctgf, Col4a2, Col1a2, Figf, Tgfbr3, Hand2, Sox17, Tek, Cyr61, Enpep, Cited1, Edn1, Cdx2, Ang, Bmp4, Flt1, Foxf1a, Gja4, Itga4, Klf4, Mmp2, Tbx20, Tbx2r</i>                                                                                                                                                                                               |
| Vasculature development (GO:0001944)                               | -4.7            | <i>Col1a1, Thbs1, Col5a1, Hand1, Lox, Col3a1, Ctgf, Col4a2, Col1a2, Figf, Tgfbr3, Hand2, Sox17, Tek, Cyr61, Enpep, Cited1, Edn1, Cdx2, Ang, Bmp4, Flt1, Foxf1a, Gja4, Itga4, Klf4, Mmp2, Tbx20, Tbx2r</i>                                                                                                                                                                                               |
| Skeletal system morphogenesis (GO:0048705)                         | -4.6            | <i>Col1a1, Ctgf, Hspg2, Alx3, Col11a1, Ghr, Hoxd9, Klf4, Mmp2, Pdgfra</i>                                                                                                                                                                                                                                                                                                                               |
| Regulation of cell adhesion (GO:0030155)                           | -4.5            | <i>Col1a1, Lama1, Nid1, Thbs1, Cyr61, Podxl, B4galnt2, Dpp4, Fbln2, Klf4, Rell2</i>                                                                                                                                                                                                                                                                                                                     |
| Collagen fibril                                                    | -4.4            | <i>Col1a1, Col5a1, Lox, Col3a1, Col1a2, Serpinh1, Adamts2, Col11a1, Col5a2, Klf4</i>                                                                                                                                                                                                                                                                                                                    |



|                                                                          |      |                                                                                                                                                                                                                                                                          |
|--------------------------------------------------------------------------|------|--------------------------------------------------------------------------------------------------------------------------------------------------------------------------------------------------------------------------------------------------------------------------|
| organization<br>(GO:0030199)                                             |      |                                                                                                                                                                                                                                                                          |
| Embryonic development<br>(GO:0009790)                                    | -4.1 | <i>Col1a1, Lama1, Gata6, Hand1, Gata4, Tgfb3, Hand2, Shank3, Sox17, Hspg2, Cited1, Edn1, Serpina1b, Cdx2, Alx3, Apba1, Bmp4, Cfc1, Col11a1, Dab2, Evx1, Foxf1a, Hoxa13, Hoxb9, Hoxc11, Hoxd9, Insl3, Itga8, Klf1, Klf4, Msx2, Myh6, Pcsk5, Pdgfra, Rbp4, Tbx20, Thbd</i> |
| Skin development<br>(GO:0043588)                                         | -4.0 | <i>Col1a1, Col5a1, Col3a1, Col1a2, Adamts2, Col5a2, Klf4</i>                                                                                                                                                                                                             |
| Positive regulation of cell-substrate adhesion<br>(GO:0010811)           | -3.9 | <i>Nid1, Thbs1, Cyr61, Fbln2, Klf4, Rel2</i>                                                                                                                                                                                                                             |
| Cell-matrix adhesion<br>(GO:0007160)                                     | -3.8 | <i>Nid1, Col3a1, Ctgf, Fn1, Sox17, Tek, Itgbl1, Klf4, Nid2</i>                                                                                                                                                                                                           |
| Cell development<br>(GO:0048468)                                         | -3.6 | <i>Lamc1, Prdm6, Pth1r, Tgfb3, Hand2, Sox17, Gdf9, Mybpc3, Hba-x, Cyp26a1, Edn1, Cdx2, Actc1, Bmp4, Col11a1, Cryaa, D3Bwg0562e, Dab2, Evx1, Grin2a, Hoxd9, Insl3, Klf1, Klf4, Lgi4, Lmx1a, Myh6, Myl2, Ntf3, Pde3a, Pdgfra, Pitx1, Rbp4, Rtn4r1</i>                      |
| Collagen biosynthetic process<br>(GO:0032964)                            | -3.4 | <i>Col1a1, Col5a1, Serpinh1, F2</i>                                                                                                                                                                                                                                      |
| Heart development<br>(GO:0007507)                                        | -3.2 | <i>Col5a1, Gata6, Hand1, Col3a1, Gata4, Myl3, Tgfb3, Hand2, Sox17, Mybpc3, Hspg2, Edn1, Actc1, Bmp4, Cfc1, Col11a1, Itga4, Klf4, Msx2, Myh6, Myl2, Pcsk5, Pln, Rbp4, Tbx20</i>                                                                                           |
| Behavior<br>(GO:0007610)                                                 | -3.2 | <i>Lama1, Thbs1, Lamc1, Alb, Slc6a3, Sox17, Cyr61, Gabra5, a, Adcy1, Apba1, Apln, Aplnr, Casr, Ccl2, Ccl7, Chrna4, Cyp11a1, Fpr1, Ghssr, Gpr34, Grin2a, Hoxd9, Itga8, Klf4, Trpv1</i>                                                                                    |
| Anatomical structure formation involved in morphogenesis<br>(GO:0048646) | -3.1 | <i>Col1a1, Thbs1, Hand1, Ctgf, Col4a2, Figf, Tgfb3, Hand2, Shank3, Sox17, Tek, Mybpc3, Cyr61, Enpep, Edn1, Cdx2, Actc1, Ang, Bmp4, Fgf3, Flt1, Hoxc11, Klf4, Mmp2, Myh6, Myl2, Rbp4, Tbx20, Tbx2r</i>                                                                    |

**Appendix Table S2 | List of miR-203 predicted targets among the transcripts downregulated in miiPSCs and involved in the epigenetic regulation of gene expression (GO0040029).**

| Transcript     | Predicted miR-203 targets           |                        | Computational Predictions<br>(method target-site start stop score)                        |
|----------------|-------------------------------------|------------------------|-------------------------------------------------------------------------------------------|
|                | miiPSC vs iPSC<br>log2(fold_change) | Agreement <sup>a</sup> |                                                                                           |
| <i>Dnmt3a</i>  | -0.53                               | 1.43                   | Miranda 7mer-m8 5437 5458 1.42576278100035                                                |
| <i>Dnmt3b</i>  | -2.36                               | 1.33                   | Miranda Offset 3-8 6mer 612 634 1.32739957876685                                          |
| <i>Uhrf2</i>   | -0.52                               | 1.31                   | Miranda N/A 790 809 1.31334769273349                                                      |
| <i>Trim27</i>  | -0.74                               | 1.29                   | Miranda Offset 3-8 6mer 87 107 1.28524392066678                                           |
| <i>Tet1</i>    | -1.05                               | 1.29                   | Miranda 8mer 128 149 1.28524392066678                                                     |
| <i>Apobec1</i> | -0.67                               | 1.26                   | Miranda N/A 679 700 1.25714014860006                                                      |
| <i>Ctcf</i>    | -0.65                               | 1.24                   | Miranda 6mer 925 947 1.24308826256671                                                     |
| <i>Hells</i>   | -1.40                               | 1.24                   | Miranda 7mer-m8 2779 2799 1.24308826256671                                                |
| <i>Klf2</i>    | -1.11                               | 1.23                   | Miranda N/A 414 437 1.22903637653335                                                      |
| <i>Mier1</i>   | -0.86                               | 1.21                   | Miranda 6mer 2450 2471 1.21498449049999                                                   |
| <i>Smarca5</i> | -0.63                               | 1.20                   | Miranda N/A 1405 1426 1.20093260446663                                                    |
| <i>Dnd1</i>    | -1.34                               | 1.20                   | Miranda Offset 3-8 6mer 247 267 1.20093260446663                                          |
| <i>Brca1</i>   | -1.51                               | 1.20                   | Miranda 6mer 692 713 1.20093260446663                                                     |
| <i>Dpy30</i>   | -0.90                               | 0.27                   | Miranda N/A 98 118 1.25714014860006  Rnahybrid Offset 1-7 8mer 109 117 -0.759910346569166 |
| <i>Rlim</i>    | -0.51                               | -0.75                  | Pita 8mer 520 526 -0.752279554170068                                                      |
| <i>Rbm3</i>    | -1.04                               | -0.76                  | Pita 8mer 442 448 -0.756298393575608                                                      |
| <i>H2afy</i>   | -0.54                               | -0.76                  | Targetscan 7mer-m8 474 480 -0.764286890785572                                             |

<sup>a</sup> The agreement score of the target, which is a weighted mean (using each method's experimental AUC) of the computational methods scores in the prediction group.

**Appendix Table S3 | Antibodies used in this work.**

| <b>Antibodies</b>         |                       |                     |                  |                                      |
|---------------------------|-----------------------|---------------------|------------------|--------------------------------------|
| <b>Antigen</b>            | <b>Catalog Number</b> | <b>Clone number</b> | <b>Source Ig</b> | <b>Source</b>                        |
| AFP                       | AF5369                | -                   | goat             | R&D Systems                          |
| Cd31                      | Ab28364               | -                   | rabbit           | Abcam                                |
| Cd34                      | Ab8158                | MEC14.7             | rat              | Abcam                                |
| Cd73                      | 13160                 | D7F9A               | rabbit           | Cell Signaling Technology            |
| CK8                       | AM-TROMA I            | -                   | mouse            | CNIO Monoclonal Antibodies Core Unit |
| Collagenase type I        | 600-401-103S          | -                   | rabbit           | Rockland                             |
| Dnmt3a                    | NB120-13888           | 64B1446             | mouse            | Novus Biological                     |
| Dnmt3b                    | NB100-56514           | 52A1018             | mouse            | Novus Biological                     |
| Gata4 (C-20)              | Sc-1237               | -                   | goat             | Santa Cruz Biotechnology             |
| GFP                       | 11 814 460 001        | 7.1+13.1            | mouse            | Roche                                |
| Histone 3 (phospho-Ser10) | 06-570                | -                   | rabbit           | Millipore                            |
| HuNu                      | NBP2-34342            | -                   | mouse            | Novus                                |
| Ki67                      | 0003110QD             | SP6                 | rabbit           | Master Diagnostica                   |
| Nestin                    | MAB353                | RAT401              | mouse            | Millipore                            |
| Nanog                     | 8822                  | D2A3                | rabbit           | Cell Signaling Technology            |
| Oct4                      | Ab19857               | -                   | rabbit           | Abcam                                |
| Oct4                      | C30A3                 | -                   | rabbit           | Cell Signalling                      |
| Pax6                      | Ab5790                | -                   | rabbit           | Abcam                                |
| Skeletal muscle actin     | M0635                 | HHF35               | mouse            | Dako                                 |
| Smooth muscle actin       | RB-9010-PO            | -                   | rabbit           | Thermo Scientific                    |
| Sox17                     | AF1924                | -                   | human            | R&D Systems                          |
| Sox2                      | AF2018                | -                   | h/mouse/rat      | R&D Systems                          |
| Sox2                      | 3728                  | C70B1               | rabbit           | Cell Signaling Technology            |
| Ter119 (LY-76)            | 550565                | Ter119              | rat              | BD Bioscience                        |
| Troponin T                | Ab8295                | 1C11                | mouse            | Abcam                                |
| Vinculin                  | V9131                 | h-VIN1              | mouse            | Sigma Aldrich                        |

**Appendix Table S4 | Oligonucleotides used in this work.**

| <b>Gene</b>                                   | <b>Forward Oligonucleotide (5'-3')</b> | <b>Reverse Oligonucleotide (5'-3')</b> |
|-----------------------------------------------|----------------------------------------|----------------------------------------|
| <b>qRT-PCR (mouse genes)</b>                  |                                        |                                        |
| <i>Dazl</i>                                   | GGTTTTACCACCCGAACCTCTG                 | TGTGGTTGCTGATGAAGACTG                  |
| <i>Dnmt1</i>                                  | CAGAGACTCCCGAGGACAGA                   | TTTACGTGTCGTTTTTCGTCTC                 |
| <i>Dnmt3a</i>                                 | AAACGGAAACGGGATGAGT                    | ACTGCAATTACCTTGGCTTTCT                 |
| <i>Dnmt3a2</i>                                | GGGCAAACCTGAAGTAGTGATGA                | TTACACGGCACCTGCTGA                     |
| <i>Dnmt3b</i>                                 | CCCTCCCCCATCCATAGT                     | TCTGCTGTCTCCCTTCATTGT                  |
| <i>Dnmt3l</i>                                 | AAGTGAACCGACGGAGCAT                    | CCGAGTGTACACCTGGAGAGTT                 |
| <i>Ecat1</i>                                  | TGTGGGGCCCTGAAAGGCGAGCTGAGAT           | ATGGGCCGCCATACGACGACGCTCAACT           |
| <i>Eras</i>                                   | ACTGCCCTCATCAGACTGCTACT                | CACTGCCTTGTACTCGGGTAGCTG               |
| <i>Esg1</i>                                   | GAAGTCTGGTTCCTTGGCAGGATG               | ACTCGATACTGGCCTAGC                     |
| <i>Fgf4</i>                                   | CGTGGTGAGCATCTTCGGAGTGG                | CCTTCTTGGTCCGCCGTTCTTA                 |
| <i>Gapdh</i>                                  | AGGTCGGTGTGAACGGATTTG                  | TGTAGACCATGTAGTTGAGGTCA                |
| <i>Gata6</i>                                  | ACCTTATGGCGTAGAAATGCTGAGGGTG           | CTGAATACTTGAGGTCACTGTTCTCGGG           |
| <i>Gdf3</i>                                   | GTTCCAACCTGTGCCTCGCGTCTT               | AGCGAGGCATGGAGAGAGCGGAGCAG             |
| <i>Hcn1</i>                                   | TGAAGCTGACAGATGGCTCTT                  | CTGGCAGTACGACGTCTCTT                   |
| <i>Isl1</i>                                   | TTGTACGGGATCAAATGCGCCAAG               | AGGCCACACAGCGGAAACA                    |
| <i>Kcna4</i>                                  | TCATTGCTCTGACCTGATGC                   | TCACTCAGCTCCCTCAGGAT                   |
| <i>Kcnh2</i>                                  | ACGCTTACTGCCAGGGTGAC                   | GCCGACTGGCAACCAGAG                     |
| <i>Myh</i>                                    | CTCAAGCTCATGGCCACTCT                   | GCCTCCTTTGCTTTTACCACT                  |
| <i>Nanog</i>                                  | CAGGTGTTTTGAGGGTAGCTC                  | CGGTTTCATCATGGTACAGTC                  |
| <i>Nppa</i>                                   | GAACCAGAGGGGAGAGACAGAG                 | CCCTCAGCTTGCTTTTTTAGGAG                |
| <i>Tbx5</i>                                   | AAATGAAACCCAGCATAGGAGCTGGC             | ACACTCAGCCTCACATCTTACCCT               |
| <i>Tnnt2</i>                                  | GGCAGCGGAAGAGGATGCTGAA                 | GAGGCACCAAGTTGGGCATGAACGA              |
| <b>qRT-PCR (rat genes)</b>                    |                                        |                                        |
| <i>Ccnb1</i>                                  | GGAGATGAAGATTCTGAGAGTTCTG              | GTATGCTGCTCCACATCGAC                   |
| <i>Gapdh</i>                                  | GGCAAGTTCAATGGCACAGT                   | TGGTGAAGACGCCAGTAGACTC                 |
| <i>Myh6</i>                                   | GGGCTGGAGCACTGAGAG                     | GAGAGAGGAACAGGCAGGAA                   |
| <i>Myh7</i>                                   | ATGGCGGATCGAGAGATG                     | GGTCAAAGGGCCTGGTCT                     |
| <b>DNA methylation analysis (mouse genes)</b> |                                        |                                        |
| <i>Elf5 (a)</i>                               | TAAAGGTTGTAATGAATAGATATTAGGTT          | AACTACTTACTTAAAAACAAATAATAACTAAA       |
| <i>Elf5 (b)</i>                               | TAAAGGTTGTAATGAATAGATATTAGGTT          | AAATAATAACTAAATCCAAACAAAAAA            |
| <i>Sirt6</i>                                  | TTTGGTTTTTTTTAGGTTATGTTAGGATTT         | CACTTACCTCTACCTCCCAATAAAAAA            |

**Appendix Table S5 | List of genes transcriptionally induced with differentially methylated regions (DMRs) in their promoter regions.**

| Gene                 | log2<br>(fold_change) | Chromosome location       | no.cpgs <sup>a</sup> | minfdr <sup>b</sup> | meanbetafc <sup>c</sup> |
|----------------------|-----------------------|---------------------------|----------------------|---------------------|-------------------------|
| <i>Card9</i>         | 3.0310                | chr2:26361346-26362230    | 6                    | 0.0030              | -0.4396                 |
| <i>1500009C09Rik</i> | 2.3588                | chr15:82251014-82252426   | 17                   | 0.0010              | -0.2494                 |
| <i>Tex13</i>         | 2.3359                | chrX:140812121-140813081  | 27                   | 2.42E-06            | -0.3500                 |
| <i>Lgals4</i>        | 1.4802                | chr7:28831931-28832324    | 9                    | 4.8360              | -0.3927                 |
| <i>Sap25</i>         | 1.2865                | chr5:137638374-137640152  | 34                   | 4.20E+06            | -0.3430                 |
| <i>Mapk15</i>        | 0.9872                | chr15:75994558-75995081   | 8                    | 0.8020              | -0.3733                 |
| <i>Nos1</i>          | 0.9719                | chr5:117866360-117867152  | 24                   | 0.0001              | -0.4193                 |
| <i>Soat2</i>         | 0.9490                | chr15:102151110-102151341 | 6                    | 0.0007              | -0.4320                 |
| <i>Lpar5</i>         | 0.9400                | chr6:125071498-125071516  | 6                    | 0.0390              | -0.5524                 |
| <i>Prtn3</i>         | 0.8944                | chr10:79882608-79882829   | 7                    | 0.8630              | -0.3877                 |
| <i>Dnajc28</i>       | 0.8890                | chr16:91620043-91621346   | 8                    | 0.0010              | -0.4510                 |
| <i>Ceacam19</i>      | 0.8198                | chr7:19888419-19888594    | 8                    | 8.3210              | -0.5751                 |
| <i>Apoc1</i>         | 0.8002                | chr7:19691828-19691867    | 8                    | 0.3060              | -0.5509                 |
| <i>Tmem44</i>        | 0.7737                | chr16:30540825-30540981   | 7                    | 0.0010              | -0.4173                 |
| <i>Dnd1</i>          | 0.7659                | chr18:36765802-36768800   | 50                   | 0.0020              | -0.1943                 |
| <i>Fry</i>           | 0.7580                | chr5:150429942-150430220  | 8                    | 0.0001              | -0.3863                 |
| <i>Sema6c</i>        | 0.7013                | chr3:95170148-95170396    | 7                    | 0.0010              | -0.3566                 |
| <i>Tfeb</i>          | 0.6646                | chr17:47764154-47764330   | 7                    | 0.0140              | -0.4370                 |
| <i>Ptch2</i>         | 0.6619                | chr4:117109577-117110528  | 6                    | 0.0020              | -0.4515                 |
| <i>B4galnt4</i>      | 0.6574                | chr7:141061951-141062856  | 10                   | 1.93E-07            | -0.4494                 |
| <i>Kdm2b</i>         | 0.6456                | chr5:122888623-122888738  | 13                   | 3.77E-04            | -0.5278                 |
| <i>Morc1</i>         | 0.6422                | chr16:48431394-48432028   | 11                   | 0.0020              | -0.4749                 |
| <i>Sumf2</i>         | 0.6154                | chr5:129850790-129850841  | 6                    | 5.05E-06            | -0.6486                 |
| <i>Zbtb8b</i>        | 0.5967                | chr4:129442499-129443802  | 16                   | 1.7880              | -0.2598                 |
| <i>Tas1r1</i>        | 0.5588                | chr4:152037421-152037714  | 6                    | 0.0010              | -0.4722                 |
| <i>2410021H03Rik</i> | 0.5357                | chr17:69277011-69279087   | 17                   | 0.0760              | -0.3687                 |
| <i>Hk2</i>           | 0.5190                | chr6:82726890-82728420    | 31                   | 0.1470              | -0.4785                 |
| <i>Slc25a19</i>      | 0.5129                | chr11:115625780-115626268 | 10                   | 0.1270              | -0.4684                 |
| <i>Fblim1</i>        | 0.5024                | chr4:141595395-141595880  | 7                    | 0.0020              | -0.3900                 |
| <i>Isyna1</i>        | 0.4849                | chr8:70595767-70596309    | 7                    | 6.5780              | -0.3871                 |
| <i>Dtx1</i>          | 0.4821                | chr5:120680962-120680998  | 6                    | 0.8520              | -0.5594                 |
| <i>Bcar3</i>         | 0.4743                | chr3:122505007-122505061  | 7                    | 9.93E-08            | -0.6311                 |
| <i>Dhx16</i>         | 0.4722                | chr17:35889547-35892069   | 21                   | 0.0630              | -0.2437                 |
| <i>Brsk1</i>         | 0.4713                | chr7:4692920-4693021      | 8                    | 1.47E+09            | -0.5558                 |
| <i>Chaf1b</i>        | 0.4604                | chr16:93902698-93902909   | 12                   | 0.0800              | -0.5051                 |
| <i>Mical3</i>        | 0.4550                | chr6:121001902-121002594  | 16                   | 6.5660              | -0.4533                 |
| <i>Nfam1</i>         | 0.4456                | chr15:83023787-83024139   | 7                    | 0.3060              | -0.5867                 |
| <i>Prune</i>         | 0.4431                | chr3:95279872-95280422    | 10                   | 0.0001              | -0.4312                 |
| <i>Mybl2</i>         | 0.4419                | chr2:163074868-163075964  | 9                    | 0.6760              | -0.4909                 |
| <i>Bcam</i>          | 0.4301                | chr7:19758423-19760076    | 17                   | 3.53E+05            | -0.5122                 |
| <i>Zfp704</i>        | 0.4122                | chr3:9566601-9568084      | 9                    | 0.0001              | -0.4371                 |
| <i>Cdc123</i>        | 0.4090                | chr2:5811880-5812644      | 16                   | 0.0210              | -0.3887                 |
| <i>Impa2</i>         | 0.4084                | chr18:67287190-67287362   | 6                    | 0.0010              | -0.5031                 |
| <i>Dpf1</i>          | 0.4082                | chr7:29315648-29316092    | 17                   | 4.54E+06            | -0.4304                 |
| <i>Cenpa</i>         | 0.4058                | chr5:30668129-30668188    | 8                    | 0.2960              | -0.5096                 |
| <i>Foxp4</i>         | 0.4022                | chr17:47878936-47878973   | 7                    | 1.35E-06            | -0.7005                 |
| <i>Epha2</i>         | 0.3852                | chr4:141307288-141308695  | 31                   | 0.0840              | -0.3077                 |
| <i>Cit</i>           | 0.3787                | chr5:115952556-115953328  | 17                   | 5.44E-05            | -0.4788                 |
| <i>Hnf1a</i>         | 0.3768                | chr5:114970850-114970910  | 6                    | 1.21E-06            | -0.6123                 |



|                 |        |                           |     |          |         |
|-----------------|--------|---------------------------|-----|----------|---------|
| <i>Pole</i>     | 0.3493 | chr5:110331107-110331873  | 9   | 0.0200   | -0.3229 |
| <i>Pou2f1</i>   | 0.3475 | chr1:165880236-165880462  | 12  | 0.0004   | -0.4728 |
| <i>Rps12</i>    | 0.3450 | chr2:122219923-122219969  | 9   | 0.0690   | -0.5073 |
| <i>Sh3tc1</i>   | 0.3445 | chr5:35720947-35722044    | 10  | 8.3050   | -0.3891 |
| <i>Pbx4</i>     | 0.3368 | chr8:69846889-69848885    | 11  | 0.0010   | -0.2221 |
| <i>Dnajc21</i>  | 0.3360 | chr15:10463618-10467308   | 28  | 8.8070   | -0.3132 |
| <i>Ncapd2</i>   | 0.3344 | chr6:125174149-125175677  | 20  | 0.0010   | -0.3534 |
| <i>Mrps24</i>   | 0.3335 | chr11:5716872-5717200     | 10  | 0.0003   | -0.5126 |
| <i>Tonsl</i>    | 0.3330 | chr15:76633104-76633169   | 8   | 9.3910   | -0.4776 |
| <i>Naa11</i>    | 0.3283 | chr5:97391967-97392011    | 7   | 0.0005   | -0.6730 |
| <i>Nrxn2</i>    | 0.3282 | chr19:6454954-6455257     | 7   | 0.0010   | -0.4474 |
| <i>Crocc</i>    | 0.3211 | chr4:141029712-141029796  | 7   | 0.7690   | -0.6701 |
| <i>Lrwd1</i>    | 0.3209 | chr5:136134007-136134770  | 18  | 2.3530   | -0.3000 |
| <i>Rfc2</i>     | 0.3117 | chr5:134595288-134595389  | 7   | 0.0001   | -0.5346 |
| <i>Zfp532</i>   | 0.3103 | chr18:65627134-65627383   | 7   | 2.7160   | -0.4654 |
| <i>Zfp593</i>   | 0.3070 | chr4:134244052-134244683  | 12  | 8.7590   | -0.4690 |
| <i>Hectd3</i>   | 0.3019 | chr4:116999149-116999555  | 10  | 0.5230   | -0.5729 |
| <i>Cd3eap</i>   | 0.2939 | chr7:19357718-19357912    | 9   | 0.0006   | -0.3733 |
| <i>Polr1c</i>   | 0.2900 | chr17:46245704-46246139   | 7   | 2.26E+08 | -0.4857 |
| <i>Clstn3</i>   | 0.2882 | chr6:124446690-124448402  | 18  | 2.7050   | -0.2512 |
| <i>Sirt6</i>    | 0.2839 | chr10:81624612-81625750   | 24  | 0.0380   | -0.4846 |
| <i>Dvl2</i>     | 0.2837 | chr11:70006361-70006406   | 7   | 0.0470   | -0.6015 |
| <i>Vps16</i>    | 0.2817 | chr2:130442204-130442461  | 6   | 0.0002   | -0.3796 |
| <i>Acin1</i>    | 0.2767 | chr14:54643976-54644009   | 7   | 0.2460   | -0.3959 |
| <i>Itgb7</i>    | 0.2757 | chr15:102230501-102230851 | 11  | 0.0007   | -0.4679 |
| <i>Tcf3</i>     | 0.2745 | chr10:80410271-80415504   | 103 | 0.115    | -0.2554 |
| <i>Sox13</i>    | 0.2739 | chr1:133383042-133383626  | 9   | 7.12E-11 | -0.4723 |
| <i>Amn</i>      | 0.2735 | chr12:111269764-111270757 | 6   | 1.5150   | -0.5448 |
| <i>Rps11</i>    | 0.2725 | chr11:116382105-116382347 | 7   | 0.0007   | -0.3943 |
| <i>Odf2</i>     | 0.2722 | chr2:29914743-29914913    | 8   | 0.0002   | -0.3648 |
| <i>Nap1l1</i>   | 0.2716 | chr10:111478164-111478910 | 7   | 8.9270   | -0.4955 |
| <i>Zmiz2</i>    | 0.2697 | chr11:6397777-6399854     | 11  | 0.0140   | -0.4916 |
| <i>Lfn1</i>     | 0.2682 | chr7:28458783-28458949    | 14  | 0.0001   | -0.2905 |
| <i>Mks1</i>     | 0.2627 | chr11:87856432-87856653   | 10  | 0.0050   | -0.4992 |
| <i>Gse1</i>     | 0.2621 | chr8:120572314-120572775  | 8   | 0.0120   | -0.6164 |
| <i>Uck2</i>     | 0.2608 | chr1:167236596-167236652  | 6   | 0.5220   | -0.6910 |
| <i>Cacnb1</i>   | 0.2588 | chr11:98011206-98014598   | 69  | 0.4200   | -0.2062 |
| <i>Myo10</i>    | 0.2578 | chr15:25768670-25768729   | 7   | 0.0450   | -0.4493 |
| <i>Slc25a12</i> | 0.2571 | chr2:71366259-71366749    | 7   | 0.0100   | -0.4947 |
| <i>Tns3</i>     | 0.2567 | chr11:8466716-8466927     | 8   | 0.1420   | -0.5812 |
| <i>Zc3hc1</i>   | 0.2555 | chr6:30374853-30375008    | 7   | 0.0010   | -0.4496 |
| <i>Cks1b</i>    | 0.2549 | chr3:89414585-89416536    | 33  | 0.0170   | -0.4376 |
| <i>Rps8</i>     | 0.2529 | chr7:13333106-13333184    | 9   | 0.0003   | -0.5923 |
| <i>Cntrob</i>   | 0.2503 | chr11:69319459-69319995   | 12  | 0.0010   | -0.2533 |
| <i>Thrap3</i>   | 0.2468 | chr4:126165523-126165568  | 6   | 1.0830   | -0.5680 |
| <i>Rpl21</i>    | 0.2449 | chr6:90846491-90847412    | 8   | 0.0040   | -0.0763 |
| <i>Pak4</i>     | 0.2434 | chr7:28594517-28596147    | 21  | 4.82E-13 | -0.4828 |
| <i>Uchl1</i>    | 0.2409 | chr5:66678486-66678753    | 8   | 0.0110   | -0.5205 |
| <i>Trf</i>      | 0.2374 | chr9:103227874-103227970  | 6   | 0.0010   | -0.4441 |
| <i>Nif3l1</i>   | 0.2353 | chr1:58456266-58456635    | 8   | 2.6680   | -0.3932 |
| <i>Park7</i>    | 0.2345 | chr4:150900352-150901445  | 21  | 4.50E+06 | -0.4359 |
| <i>Trim2</i>    | 0.2345 | chr3:84303967-84304240    | 8   | 0.0008   | -0.3292 |
| <i>Jmjd6</i>    | 0.2331 | chr11:116839751-116840233 | 12  | 0.0050   | -0.4929 |
| <i>Nbeal2</i>   | 0.2305 | chr9:110638420-110638536  | 10  | 0.0010   | -0.5547 |

|                 |        |                           |     |          |         |
|-----------------|--------|---------------------------|-----|----------|---------|
| <i>Plagl1</i>   | 0.2303 | chr10:13112825-13122663   | 90  | 0.0040   | -0.2826 |
| <i>Smchd1</i>   | 0.2298 | chr17:71393041-71396092   | 26  | 0.0040   | -0.1220 |
| <i>Trmu</i>     | 0.2285 | chr15:85877278-85877567   | 6   | 0.0002   | -0.6153 |
| <i>Zc3h15</i>   | 0.2280 | chr2:83655204-83655519    | 10  | 0.0001   | -0.3716 |
| <i>Fastkd1</i>  | 0.2266 | chr2:69712291-69712474    | 12  | 6.89E+06 | -0.5398 |
| <i>Gfm2</i>     | 0.2256 | chr13:97161099-97161825   | 18  | 0.0720   | -0.1601 |
| <i>Phf10</i>    | 0.2256 | chr17:14944229-14945883   | 8   | 0.0006   | -0.2638 |
| <i>Dhx30</i>    | 0.2247 | chr9:110084571-110084637  | 6   | 2.7820   | -0.6059 |
| <i>Ptov1</i>    | 0.2243 | chr7:44870982-44871042    | 6   | 0.0050   | -0.6223 |
| <i>Racgap1</i>  | 0.2221 | chr15:99639637-99639790   | 10  | 0.1260   | -0.5171 |
| <i>Esrrb</i>    | 0.2220 | chr12:86505820-86505961   | 9   | 0.0010   | -0.4875 |
| <i>Zbtb48</i>   | 0.2212 | chr4:152020406-152020687  | 8   | 0.0003   | -0.4390 |
| <i>Jakmip1</i>  | 0.2185 | chr5:37085385-37085514    | 8   | 3.16E+08 | -0.5586 |
| <i>Gtpbp4</i>   | 0.2163 | chr13:8994607-8994658     | 6   | 0.0003   | -0.6035 |
| <i>Abt1</i>     | 0.2135 | chr13:23422043-23422602   | 26  | 4.31E-08 | -0.4918 |
| <i>Vars</i>     | 0.2117 | chr17:35011265-35012491   | 12  | 1.48E+06 | -0.5346 |
| <i>Got1</i>     | 0.2097 | chr19:43516007-43516515   | 14  | 0.0007   | -0.3548 |
| <i>Myl7</i>     | 0.2065 | chr11:5899323-5899371     | 6   | 0.0020   | -0.4525 |
| <i>Exosc10</i>  | 0.2063 | chr4:148563038-148564654  | 36  | 4.13E-04 | -0.2574 |
| <i>Prex1</i>    | 0.2016 | chr2:166598038-166601919  | 22  | 1.00E+09 | -0.4438 |
| <i>Top3a</i>    | 0.2014 | chr11:60752044-60753293   | 24  | 0.0005   | -0.3589 |
| <i>Ncaph2</i>   | 0.2011 | chr15:89371716-89372226   | 14  | 2.54E+06 | -0.4929 |
| <i>Alpl</i>     | 0.1979 | chr4:137794259-137795052  | 13  | 8.84E+07 | -0.4604 |
| <i>Agbl5</i>    | 0.1933 | chr5:30891131-30892018    | 17  | 0.0015   | -0.4101 |
| <i>Akap9</i>    | 0.1906 | chr5:4059568-4060361      | 11  | 3.5750   | -0.4169 |
| <i>Atad5</i>    | 0.1885 | chr11:80103891-80103913   | 10  | 2.8790   | -0.6230 |
| <i>Det1</i>     | 0.1879 | chr7:78843191-78843858    | 12  | 0.0670   | -0.6086 |
| <i>Dnajc11</i>  | 0.1834 | chr4:151967333-151968570  | 8   | 0.0002   | -0.5787 |
| <i>Iffo1</i>    | 0.1818 | chr6:125150967-125151153  | 7   | 0.1310   | -0.4687 |
| <i>Mc5r</i>     | 0.1813 | chr18:68339054-68339604   | 20  | 2.66E-04 | -0.5260 |
| <i>Dus1l</i>    | 0.1808 | chr11:120787527-120788151 | 6   | 0.0090   | -0.4824 |
| <i>Gtpbp6</i>   | 0.1772 | chr5:110103744-110104347  | 21  | 0.4050   | -0.3806 |
| <i>Shkbp1</i>   | 0.1762 | chr7:27351821-27353273    | 30  | 0.0004   | -0.2702 |
| <i>Zfp60</i>    | 0.1752 | chr7:27737408-27738831    | 7   | 0.0006   | -0.3710 |
| <i>Secisbp2</i> | 0.1741 | chr13:51682031-51682142   | 7   | 0.0040   | -0.6759 |
| <i>Ptbp1</i>    | 0.1740 | chr10:79861773-79862188   | 15  | 1.3530   | -0.4227 |
| <i>Prkar2a</i>  | 0.1729 | chr9:108746985-108747991  | 17  | 3.17E+03 | -0.4623 |
| <i>Filip1</i>   | 0.1724 | chr9:79830256-79830338    | 7   | 0.657    | -0.6139 |
| <i>Iars2</i>    | 0.1676 | chr1:185287299-185287371  | 10  | 4.22E-06 | -0.5598 |
| <i>Radil</i>    | 0.1655 | chr5:142475300-142485935  | 139 | 0.0620   | -0.1954 |
| <i>Aars</i>     | 0.1638 | chr8:111042668-111042815  | 14  | 2.25E+05 | -0.4703 |
| <i>Ccnt1</i>    | 0.1632 | chr15:98544549-98545004   | 13  | 0.0070   | -0.4779 |
| <i>Tsr1</i>     | 0.1602 | chr11:74900020-74901322   | 13  | 4.5920   | -0.4345 |
| <i>Tnrc18</i>   | 0.1546 | chr5:142762696-142764773  | 39  | 0.0005   | -0.2937 |
| <i>Vangl2</i>   | 0.1511 | chr1:172007981-172009236  | 33  | 0.0011   | -0.3544 |
| <i>Atp5g3</i>   | 0.1492 | chr2:73907602-73909937    | 17  | 0.0004   | -0.3202 |
| <i>Ubap2</i>    | 0.1449 | chr4:41201473-41203374    | 18  | 1.0110   | -0.2629 |
| <i>Iars</i>     | 0.1447 | chr13:49703042-49704932   | 18  | 1.46E+08 | -0.3757 |
| <i>Slc38a3</i>  | 0.1437 | chr9:107657872-107658004  | 7   | 7.8380   | -0.4992 |
| <i>BC021614</i> | 0.1388 | chr19:4059680-4060040     | 8   | 0.0020   | -0.4783 |
| <i>Traf3ip1</i> | 0.1363 | chr1:91518727-91519400    | 13  | 0.0010   | -0.2607 |
| <i>Smpd2</i>    | 0.1326 | chr10:41487060-41488055   | 6   | 0.1260   | -0.4790 |
| <i>Aldh7a1</i>  | 0.1316 | chr18:56528350-56529182   | 10  | 0.2550   | -0.5182 |
| <i>Top1mt</i>   | 0.1300 | chr15:75676582-75676912   | 9   | 1.4720   | -0.3281 |

|                      |        |                           |     |          |         |
|----------------------|--------|---------------------------|-----|----------|---------|
| <i>Cln3</i>          | 0.1288 | chr8:60956331-60957191    | 17  | 0.0010   | -0.2728 |
| <i>Psrc1</i>         | 0.1280 | chr3:108387230-108387356  | 7   | 5.5720   | -0.5486 |
| <i>Tnpo1</i>         | 0.1271 | chr13:98889338-98889354   | 9   | 0.0030   | -0.6069 |
| <i>Chmp7</i>         | 0.1241 | chr14:69730221-69731301   | 17  | 0.0001   | -0.3227 |
| <i>2700060E02Rik</i> | 0.1238 | chr14:19822664-19826559   | 126 | 0.0002   | -0.1172 |
| <i>Ppof2</i>         | 0.1234 | chr5:92229344-92235736    | 75  | 0.4080   | -0.1644 |
| <i>Dapk3</i>         | 0.1227 | chr10:81184084-81185082   | 13  | 0.0035   | -0.3535 |
| <i>Cdk2ap1</i>       | 0.1211 | chr5:124349404-124349443  | 6   | 0.0011   | -0.4364 |
| <i>Krt42</i>         | 0.1209 | chr11:100263299-100265351 | 38  | 0.0310   | -0.4086 |
| <i>Myo1b</i>         | 0.1207 | chr1:51896163-51896224    | 6   | 0.0001   | -0.5081 |
| <i>Ddx6</i>          | 0.1199 | chr9:44606787-44607581    | 7   | 0.1670   | -0.4295 |
| <i>Prkab1</i>        | 0.1153 | chr5:116021558-116021689  | 8   | 0.1530   | -0.5096 |
| <i>Pomt1</i>         | 0.1075 | chr2:32229084-32235234    | 79  | 1.4770   | -0.3072 |
| <i>Zc3h18</i>        | 0.1047 | chr8:122408007-122408692  | 7   | 0.0005   | -0.4486 |
| <i>Rtf1</i>          | 0.1046 | chr2:119709485-119710363  | 7   | 0.0034   | -0.2687 |
| <i>Top3b</i>         | 0.1040 | chr16:16872546-16874776   | 16  | 0.0002   | -0.2461 |
| <i>Arl6ip1</i>       | 0.1019 | chr7:118126877-118128245  | 10  | 6.2640   | -0.4010 |
| <i>Eid2</i>          | 0.1013 | chr7:28269825-28274860    | 36  | 5.0430   | -0.2739 |
| <i>Parl</i>          | 0.1008 | chr16:20297449-20299212   | 21  | 0.0012   | -0.4763 |
| <i>Timm17a</i>       | 0.0991 | chr1:135309837-135310477  | 7   | 3.82E-06 | -0.4633 |
| <i>Tdg</i>           | 0.0974 | chr10:82644346-82644394   | 7   | 0.0010   | -0.6260 |
| <i>Men1</i>          | 0.0960 | chr19:6338886-6339016     | 8   | 2.9010   | -0.3396 |
| <i>Tbc1d24</i>       | 0.0959 | chr17:24198261-24198855   | 6   | 8.3620   | -0.5230 |
| <i>Prrc2b</i>        | 0.0948 | chr2:32213479-32214968    | 15  | 0.0240   | -0.5174 |
| <i>Klf3</i>          | 0.0932 | chr5:64815428-64817322    | 33  | 0.0800   | -0.3528 |
| <i>Cox4i1</i>        | 0.0928 | chr8:120672644-120672694  | 6   | 0.6360   | -0.5053 |
| <i>Cpsf6</i>         | 0.0906 | chr10:117356042-117356122 | 9   | 2.4170   | -0.5502 |
| <i>R3hdm2</i>        | 0.0904 | chr10:127418049-127424591 | 50  | 0.0150   | -0.1616 |
| <i>Vdac1</i>         | 0.0901 | chr11:52376482-52386901   | 105 | 0.0021   | -0.2257 |
| <i>Zwilch</i>        | 0.0893 | chr9:64148962-64149781    | 8   | 0.0006   | -0.4712 |
| <i>Nav1</i>          | 0.0879 | chr1:135465846-135465950  | 8   | 0.1820   | -0.5859 |
| <i>E2f7</i>          | 0.0877 | chr10:110754202-110754291 | 6   | 0.0001   | -0.5316 |
| <i>Drq2</i>          | 0.0857 | chr11:60460762-60460839   | 8   | 3.1860   | -0.4773 |
| <i>Pycr2</i>         | 0.0843 | chr1:180906215-180907783  | 48  | 0.0050   | -0.2529 |
| <i>Anapc13</i>       | 0.0842 | chr9:102624917-102625037  | 6   | 9.4800   | -0.5179 |
| <i>Lsm4</i>          | 0.0817 | chr8:70677853-70678480    | 7   | 0.0002   | -0.3966 |
| <i>Tmem63b</i>       | 0.0811 | chr17:45665139-45665728   | 15  | 0.0770   | -0.5041 |
| <i>Hspa9</i>         | 0.0770 | chr18:34950400-34950768   | 9   | 5.3070   | -0.4960 |
| <i>Kdm4b</i>         | 0.0768 | chr17:56370706-56371155   | 11  | 8.53E+04 | -0.5164 |
| <i>Dcaf15</i>        | 0.0755 | chr8:84102177-84102999    | 17  | 4.4500   | -0.3282 |
| <i>Scal</i>          | 0.0752 | chr2:39105994-39107017    | 11  | 0.0003   | -0.1717 |
| <i>Fbxo31</i>        | 0.0709 | chr8:121558124-121558989  | 7   | 0.0003   | -0.4397 |
| <i>Smarca5</i>       | 0.0670 | chr8:80724816-80726986    | 10  | 0.0645   | -0.4076 |
| <i>Hsp90aa1</i>      | 0.0645 | chr12:110704558-110704774 | 8   | 6.48E-07 | -0.4935 |
| <i>2210016L21Rik</i> | 0.0619 | chr5:114944212-114945943  | 7   | 0.0003   | -0.5815 |
| <i>Ddx5</i>          | 0.0616 | chr11:106782217-106782484 | 6   | 0.0003   | -0.3658 |
| <i>Csnk2b</i>        | 0.0593 | chr17:35118996-35120084   | 11  | 0.0020   | -0.1855 |
| <i>Pias3</i>         | 0.0574 | chr3:96702794-96703600    | 10  | 0.0020   | -0.4792 |
| <i>Sumo3</i>         | 0.0571 | chr10:77616211-77616338   | 7   | 1.26E+09 | -0.4807 |
| <i>Alkbh4</i>        | 0.0557 | chr5:136140744-136142305  | 14  | 0.1270   | -0.2995 |
| <i>Tardbp</i>        | 0.0557 | chr4:148623274-148624465  | 17  | 0.0140   | -0.3295 |
| <i>Cln3</i>          | 0.0556 | chr7:126572254-126572634  | 7   | 0.0020   | -0.3839 |
| <i>Shf</i>           | 0.0553 | chr2:122355520-122356667  | 12  | 0.1120   | -0.3649 |
| <i>Msi1</i>          | 0.0512 | chr5:115431814-115432737  | 18  | 0.0002   | -0.3109 |

|                |        |                           |     |          |         |
|----------------|--------|---------------------------|-----|----------|---------|
| <i>Coro1c</i>  | 0.0487 | chr5:113880763-113881947  | 34  | 0.0008   | -0.3454 |
| <i>Son</i>     | 0.0479 | chr16:91659908-91660031   | 11  | 5.0060   | -0.4297 |
| <i>Cd9</i>     | 0.0455 | chr6:125460674-125464025  | 64  | 0.0002   | -0.2510 |
| <i>Zfp335</i>  | 0.0412 | chr2:164907220-164907667  | 18  | 1.22E+06 | -0.4374 |
| <i>Slmo2</i>   | 0.0394 | chr2:174473945-174479354  | 42  | 0.0006   | -0.2251 |
| <i>Rbpms</i>   | 0.0369 | chr8:33841731-33841752    | 7   | 0.0001   | -0.5871 |
| <i>Ube2v1</i>  | 0.0337 | chr2:167610327-167612130  | 21  | 1.47E+09 | -0.4094 |
| <i>Vdac2</i>   | 0.0325 | chr14:21840491-21841860   | 13  | 8.6210   | -0.3576 |
| <i>Ppp2r5b</i> | 0.0321 | chr19:6229036-6238486     | 164 | 0.0006   | -0.1795 |
| <i>P2rx7</i>   | 0.0295 | chr5:122648592-122649715  | 20  | 0.0060   | -0.4035 |
| <i>Fam161b</i> | 0.0289 | chr12:84354884-84354967   | 7   | 0.0060   | -0.5422 |
| <i>Arhgdia</i> | 0.0268 | chr11:120579214-120579687 | 14  | 3.3140   | -0.3679 |
| <i>Impact</i>  | 0.0261 | chr18:12974077-12974132   | 7   | 0.0001   | -0.7501 |
| <i>Nisch</i>   | 0.0250 | chr14:31185002-31185220   | 9   | 0.0001   | -0.4134 |
| <i>Ptprf</i>   | 0.0228 | chr4:118214221-118215801  | 14  | 1.8050   | -0.3547 |
| <i>Eya1</i>    | 0.0224 | chr1:14304450-14305238    | 22  | 9.41E-11 | -0.5070 |
| <i>Nucks1</i>  | 0.0211 | chr1:131928102-131928202  | 5   | 0.0004   | -0.4003 |
| <i>Npr1</i>    | 0.0190 | chr3:90459070-90459836    | 11  | 0.0002   | -0.3366 |
| <i>Ccz1</i>    | 0.0180 | chr5:143992596-143993168  | 16  | 0.0010   | -0.5465 |
| <i>Fryl</i>    | 0.0165 | chr5:73089057-73089316    | 11  | 0.0001   | -0.5508 |
| <i>Ywhaq</i>   | 0.0115 | chr5:114829129-114829240  | 10  | 0.0390   | -0.5325 |
| <i>Osbp</i>    | 0.0063 | chr19:11967584-11968641   | 12  | 0.0002   | -0.2007 |
| <i>Hip1r</i>   | 0.0047 | chr5:123999922-123999964  | 6   | 0.0510   | -0.3374 |
| <i>Rars2</i>   | 0.0017 | chr4:34647898-34648282    | 13  | 0.0001   | -0.4473 |

<sup>a</sup> no.cpgs: Number of CpG sites constituting the DMR.

<sup>b</sup> minfdr: Minimum adjusted p-value from the CpGs constituting the significant region.

<sup>c</sup> meanbetafc: Mean beta fold change within the region.

**Appendix Table S6 | Gene Ontology Analysis of genes up-regulated and hypomethylated in *m*PSCs (+ transient treatment with miR-203) versus control PSCs.**

| Gene Ontology                                     | Log10 (p-value) | Molecules                                                                                                                                                              |
|---------------------------------------------------|-----------------|------------------------------------------------------------------------------------------------------------------------------------------------------------------------|
| Chromosome organization (GO:0051276)              | -4.0            | <i>Acin1, Smchd1, Ncapd2, Ncaph2, CenpA, Nap111, Men1, Hnf1a, Tcf3, Kdm4b, Smarce1, Kdm2b, Jmjd6Dapk3</i>                                                              |
| DNA topoisomerase type I activity (GO:0003917)    | -3.1            | <i>Top3A, Top3B, Top1MT, POLE, Chaf1B, Tcf3, Isyna1</i>                                                                                                                |
| Cell cycle (GO:0007049)                           | -2.7            | <i>Psrc1, Men, Crocc, Cdk2ap1, Chaf1b, E2f7, Fbxo31, Tcf3, Brsk1, Ccnt1, Cks1b, Cdc28, Cntrob, Racgap1, Racgap1, Anapc13, Ncapd2, citron, Zc3hc1</i>                   |
| DNA topoisomerase activity (GO:0003916)           | -2.7            | <i>Top3A, Top3B, Top1MT, POLE, Chaf1B, Tcf3, Isyna1</i>                                                                                                                |
| DNA topological change (GO:0006265)               | -2.5            | <i>Top3A, Top3B, Top1MT, POLE, Chaf1B, Tcf3, Isyna1</i>                                                                                                                |
| Chromatin organization (GO:0006325)               | -2.3            | <i>Acin1, Smchd1, Ncapd2, Ncaph2, CenpA, Nap111, Men1, Hnf1a, Tcf3, Kdm4b, Smarce1, Kdm2b, Jmjd6Dapk3</i>                                                              |
| DNA unwinding during replication (GO:0006268)     | -2.1            | <i>Top3A, Top3B, Top1MT, POLE, Chaf1B, Tcf3, Isyna1</i>                                                                                                                |
| Chromatin modification (GO:0016568)               | -2.1            | <i>Acin1, Smchd1, Ncapd2, Ncaph2, CenpA, Nap111, Men1, Hnf1a, Tcf3, Kdm4b, Smarce1, Kdm2b, Jmjd6, Dapk3</i>                                                            |
| DNA duplex unwinding (GO:0032508)                 | -2.1            | <i>Top3A, Top3B, Top1MT, POLE, Chaf1B, Tcf3, Isyna1</i>                                                                                                                |
| Cell division (GO:0051301)                        | -2.0            | <i>Psrc1, Men, Crocc, Cdk2ap1, Chaf1b, E2f7, Fbxo31, Tcf3, Brsk1, Ccnt1, Cks1b, Cdc28, Cntrob, Racgap1, Racgap1, Anapc13, Ncapd2, citron, Zc3hc1</i>                   |
| Cytoskeleton (GO:0005856)                         | -2.0            | <i>Trim2, Itgb7, Nos1, Dvl2, citron, Hip1r, Coro1a, Mical3, Fblim1, String, Krt42, Myl7, Myo10, Myo1b, Akap9, Traf3ip2, Psrc1, Odf2, Nav, Cntrob, Jakmip1, Racgap1</i> |
| DNA geometric change (GO:0032392)                 | -2.0            | <i>Top3A, Top3B, Top1MT, POLE, Chaf1B, Tcf3, Isyna1</i>                                                                                                                |
| Voltage-gated anion channel activity (GO:0008308) | -1.7            | <i>Vdac1, Vdac2, Cic3, Cacnb1, P2rx7, Sh3kbp1, Trsf, Atp5g2, Slc38a3, Slc25a12, Racgap1, Timm17b, Slc25a19, Osbp, Chmp7, Jakmip1, Tnp01, Apoc1, Nos1</i>               |
| Cell cycle process (GO:0022402)                   | -1.3            | <i>Psrc1, Men, Crocc, Cdk2ap1, Chaf1b, E2f7, Fbxo31, Tcf3, Brsk1, Ccnt1, Cks1b, Cdc28, Cntrob, Racgap1, Racgap1, Anapc13, Ncapd2, citron, Zc3hc1</i>                   |
| DNA-dependent DNA replication (GO:0006261)        | -1.2            | <i>Top3A, Top3B, Top1MT, POLE, Chaf1B, Tcf3, Isyna1</i>                                                                                                                |
| Embryonic morphogenesis (GO:0048598)              | -1.2            | <i>P2rx7, Pou2f1, Foxp4, Esrrb, Hnf1a, Dvl2, Vangl2, Epha2</i>                                                                                                         |
| Mitotic cell cycle (GO:0000278)                   | -1.1            | <i>Psrc1, Men, Crocc, Cdk2ap1, Chaf1b, E2f7, Fbxo31, Tcf3, Brsk1, Ccnt1, Cks1b, Cdc28, Cntrob, Racgap1, Racgap1, Anapc13, Ncapd2, citron, Zc3hc1</i>                   |
| Microtubule cytoskeleton (GO:0015630)             | -1.1            | <i>Trim2, Itgb7, Nos1, Dvl2, citron, Hip1r, Coro1a, Mical3, Fblim1, String, Krt42, Myl7, Myo10, Myo1b, Akap9, Traf3ip2, Psrc1, Odf2, Nav, Cntrob, Jakmip1, Racgap1</i> |
| DNA replication (GO:0006260)                      | -1.0            | <i>Top3A, Top3B, Top1MT, POLE, Chaf1B, Tcf3, Isyna1</i>                                                                                                                |
| Myosin complex (GO:0016459)                       | -0.9            | <i>Myo10, citron, Myo1b, Myl9</i>                                                                                                                                      |



|                                                 |      |                                                                                                                                                                        |
|-------------------------------------------------|------|------------------------------------------------------------------------------------------------------------------------------------------------------------------------|
| Cytoskeletal protein binding (GO:0008092)       | -0.9 | <i>Trim2, Itgb7, Nos1, Dvl2, citron, Hip1r, Coro1a, Mical3, Fblim1, String, Krt42, Myl7, Myo10, Myo1b, Akap9, Traf3ip2, Psrc1, Odf2, Nav, Cntrob, Jakmip1, Racgap1</i> |
| Cytoskeletal part (GO:0044430)                  | -0.8 | <i>Trim2, Itgb7, Nos1, Dvl2, citron, Hip1r, Coro1a, Mical3, Fblim1, String, Krt42, Myl7, Myo10, Myo1b, Akap9, Traf3ip2, Psrc1, Odf2, Nav, Cntrob, Jakmip1, Racgap1</i> |
| Voltage-gated ion channel activity (GO:0005244) | -0.7 | <i>Vdac1, Vdac2, Cic3, Cacnb1, P2rx7, Sh3kbp1, Trsf, Atp5g2, Slc38a3, Slc25a12, Racgap1, Timm17b, Slc25a19, Osbp, Chmp7, Jakmip1, Tnpo1, Apoc1, Nos1</i>               |
| Nuclear division (GO:0000280)                   | -0.7 | <i>Psrc1, Men, Crocc, Cdk2ap1, Chaf1b, E2f7, Fbxo31, Tcf3, Brsk1, Ccnt1, Cks1b, Cdc28, Cntrob, Racgap1, Racgap1, Anapc13, Ncapd2, citron, Zc3hc1</i>                   |
| Mitosis (GO:0007067)                            | -0.7 | <i>Psrc1, Men, Crocc, Cdk2ap1, Chaf1b, E2f7, Fbxo31, Tcf3, Brsk1, Ccnt1, Cks1b, Cdc28, Cntrob, Racgap1, Racgap1, Anapc13, Ncapd2, citron, Zc3hc1</i>                   |
| M phase of mitotic cell cycle (GO:0000087)      | -0.7 | <i>Psrc1, Men, Crocc, Cdk2ap1, Chaf1b, E2f7, Fbxo31, Tcf3, Brsk1, Ccnt1, Cks1b, Cdc28, Cntrob, Racgap1, Racgap1, Anapc13, Ncapd2, citron, Zc3hc1</i>                   |
| Anion transport (GO:0006820)                    | -0.7 | <i>Vdac1, Vdac2, Cic3, Cacnb1, P2rx7, Sh3kbp1, Trsf, Atp5g2, Slc38a3, Slc25a12, Racgap1, Timm17b, Slc25a19, Osbp, Chmp7, Jakmip1, Tnpo1, Apoc1, Nos1</i>               |
| Cell cycle phase (GO:0022403)                   | -0.7 | <i>Psrc1, Men, Crocc, Cdk2ap1, Chaf1b, E2f7, Fbxo31, Tcf3, Brsk1, Ccnt1, Cks1b, Cdc28, Cntrob, Racgap1, Racgap1, Anapc13, Ncapd2, citron, Zc3hc1</i>                   |
| Ion channel activity (GO:0005216)               | -0.7 | <i>Vdac1, Vdac2, Cic3, Cacnb1, P2rx7, Sh3kbp1, Trsf, Atp5g2, Slc38a3, Slc25a12, Racgap1, Timm17b, Slc25a19, Osbp, Chmp7, Jakmip1, Tnpo1, Apoc1, Nos1</i>               |
| Organelle fission (GO:0048285)                  | -0.7 | <i>Psrc1, Men, Crocc, Cdk2ap1, Chaf1b, E2f7, Fbxo31, Tcf3, Brsk1, Ccnt1, Cks1b, Cdc28, Cntrob, Racgap1, Racgap1, Anapc13, Ncapd2, citron, Zc3hc1</i>                   |
| DNA metabolic process (GO:0006259)              | -0.6 | <i>Top3A, Top3B, Top1MT, POLE, Chaf1B, Tcf3, Isyna1</i>                                                                                                                |
| Cellular component morphogenesis (GO:0032989)   | -0.6 | <i>Citron, Crocc, Cd9, Brsk1, Esrrb, P2rx7, Vangl2, Sema6c, Uchl1</i>                                                                                                  |
| Neural tube development (GO:0021915)            | -0.6 | <i>P2rx7, Pou2f1, Foxp4, Esrrb, Hnf1a, Dvl2, Vangl2, Epha2</i>                                                                                                         |
| Gated channel activity (GO:0022836)             | -0.6 | <i>Vdac1, Vdac2, Cic3, Cacnb1, P2rx7, Sh3kbp1, Trsf, Atp5g2, Slc38a3, Slc25a12, Racgap1, Timm17b, Slc25a19, Osbp, Chmp7, Jakmip1, Tnpo1, Apoc1, Nos1</i>               |
| Cell fate commitment (GO:0045165)               | -0.6 | <i>Citron, Crocc, Cd9, Brsk1, Esrrb, P2rx7, Vangl2, Sema6c, Uchl1</i>                                                                                                  |
| Histone modification (GO:0016570)               | -0.5 | <i>Pou2f1, Eya1, Tcf3</i>                                                                                                                                              |
| Regulation of cell migration (GO:0030334)       | -0.5 | <i>Gtpbp4, Nisch</i>                                                                                                                                                   |
| Cell morphogenesis (GO:0000902)                 | -0.5 | <i>Citron, Crocc, Cd9, Brsk1, Esrrb, P2rx7, Vangl2, Sema6c, Uchl1</i>                                                                                                  |
| Covalent chromatin modification (GO:0016569)    | -0.5 | <i>Acin1, Smchd1, Ncapd2, Ncaph2, CenpA, Nap111, Men1, Hnf1a, Tcf3, Kdm4b, Smarce1, Kdm2b, Jmjd6Dapk3</i>                                                              |
| Tissue morphogenesis (GO:0048729)               | -0.5 | <i>P2rx7, Pou2f1, Foxp4, Esrrb, Hnf1a, Dvl2, Vangl2, Epha2</i>                                                                                                         |
| Cell projection organization (GO:0030030)       | -0.5 | <i>Citron, Crocc, Cd9, Brsk1, Esrrb, P2rx7, Vangl2, Sema6c, Uchl1</i>                                                                                                  |
| Ion transport (GO:0006811)                      | -0.5 | <i>Vdac1, Vdac2, Cic3, Cacnb1, P2rx7, Sh3kbp1, Trsf, Atp5g2, Slc38a3, Slc25a12, Racgap1, Timm17b, Slc25a19, Osbp, Chmp7, Jakmip1, Tnpo1, Apoc1, Nos1</i>               |

|                                                                       |      |                                                                                                                                                                        |
|-----------------------------------------------------------------------|------|------------------------------------------------------------------------------------------------------------------------------------------------------------------------|
| Actin cytoskeleton<br>(GO:0015629)                                    | -0.5 | <i>Trim2, Itgb7, Nos1, Dvl2, citron, Hip1r, Coro1a, Mical3, Fblim1, String, Krt42, Myl7, Myo10, Myo1b, Akap9, Traf3ip2, Psrc1, Odf2, Nav, Cntrob, Jakmip1, Racgap1</i> |
| Multicellular organism reproduction<br>(GO:0032504)                   | -0.4 | <i>Cd9, Dvl2, Eya1, Vangl2, Radil, Amn, Hk2, Eid2, Nav1, Sema6c, Jmjd6, Dnd1, citron, Morc1, Racgap1, Odf2</i>                                                         |
| Reproductive process in a multicellular organism<br>(GO:0048609)      | -0.4 | <i>Cd9, Dvl2, Eya1, Vangl2, Radil, Amn, Hk2, Eid2, Nav1, Sema6c, Jmjd6, Dnd1, citron, Morc1, Racgap1, Odf2</i>                                                         |
| Regulation of cell motion<br>(GO:0051270)                             | -0.4 | <i>Gtpbp4, Nisch</i>                                                                                                                                                   |
| Regulation of locomotion<br>(GO:0040012)                              | -0.4 | <i>Gtpbp4, Nisch</i>                                                                                                                                                   |
| Tube development<br>(GO:0035295)                                      | -0.4 | <i>P2rx7, Pou2f1, Foxp4, Esrrb, Hnf1a, Dvl2, Vangl2, Epha2</i>                                                                                                         |
| Chordate embryonic development<br>(GO:0043009)                        | -0.4 | <i>P2rx7, Pou2f1, Foxp4, Esrrb, Hnf1a, Dvl2, Vangl2, Epha2</i>                                                                                                         |
| Epithelial tube morphogenesis<br>(GO:0060562)                         | -0.4 | <i>P2rx7, Pou2f1, Foxp4, Esrrb, Hnf1a, Dvl2, Vangl2, Epha2</i>                                                                                                         |
| Chordate embryonic development<br>(GO:0043009)                        | -0.4 | <i>P2rx7, Pou2f1, Foxp4, Esrrb, Hnf1a, Dvl2, Vangl2, Epha2</i>                                                                                                         |
| Embryonic development ending in birth or egg hatching<br>(GO:0009792) | -0.4 | <i>P2rx7, Pou2f1, Foxp4, Esrrb, Hnf1a, Dvl2, Vangl2, Epha2</i>                                                                                                         |
| Calcium signaling pathway (mmu04020)                                  | -0.4 | <i>Vdac1, Vdac2, Cic3, Cacnb1, P2rx7, Sh3kbp1, Trsf, Atp5g2, Slc38a3, Slc25a12, Racgap1, Timm17b, Slc25a19, Osbp, Chmp7, Jakmip1, Tnp01, Apoc1, Nos1</i>               |
| M phase (GO:0000279)                                                  | -0.4 | <i>Psrc1, Men, Crocc, Cdk2ap1, Chaf1b, E2f7, Fbxo31, Tcf3, Brsk1, Ccnt1, Cks1b, Cdc28, Cntrob, Racgap1, Racgap1, Anapc13, Ncapd2, citron, Zc3hc1</i>                   |
| Substrate specific channel activity<br>(GO:0022838)                   | -0.3 | <i>Vdac1, Vdac2, Cic3, Cacnb1, P2rx7, Sh3kbp1, Trsf, Atp5g2, Slc38a3, Slc25a12, Racgap1, Timm17b, Slc25a19, Osbp, Chmp7, Jakmip1, Tnp01, Apoc1, Nos1</i>               |
| Skeletal system morphogenesis<br>(GO:0048705)                         | -0.3 | <i>P2rx7, Pou2f1, Foxp4, Esrrb, Hnf1a, Dvl2, Vangl2, Epha2</i>                                                                                                         |
| Channel activity<br>(GO:0015267)                                      | -0.3 | <i>Vdac1, Vdac2, Cic3, Cacnb1, P2rx7, Sh3kbp1, Trsf, Atp5g2, Slc38a3, Slc25a12, Racgap1, Timm17b, Slc25a19, Osbp, Chmp7, Jakmip1, Tnp01, Apoc1, Nos1</i>               |
| Sexual reproduction<br>(GO:0019953)                                   | -0.3 | <i>Cd9, Dvl2, Eya1, Vangl2, Radil, Amn, Hk2, Eid2, Nav1, Sema6c, Jmjd6, Dnd1, citron, Morc1, Racgap1, Odf2</i>                                                         |
| Motor activity<br>(GO:0003774)                                        | -0.3 | <i>Myo10, citron, Myo1b, Myl9</i>                                                                                                                                      |
| Gamete generation<br>(GO:0007276)                                     | -0.3 | <i>Cd9, Dvl2, Eya1, Vangl2, Radil, Amn, Hk2, Eid2, Nav1, Sema6c, Jmjd6, Dnd1, citron, Morc1, Racgap1, Odf2</i>                                                         |
| Embryonic organ development<br>(GO:0048568)                           | -0.3 | <i>P2rx7, Pou2f1, Foxp4, Esrrb, Hnf1a, Dvl2, Vangl2, Epha2</i>                                                                                                         |
| Embryonic organ                                                       | -0.2 | <i>P2rx7, Pou2f1, Foxp4, Esrrb, Hnf1a, Dvl2, Vangl2, Epha2</i>                                                                                                         |

|                                                                |      |                                                                                                                                                          |
|----------------------------------------------------------------|------|----------------------------------------------------------------------------------------------------------------------------------------------------------|
| morphogenesis<br>(GO:0048562)                                  |      |                                                                                                                                                          |
| Spermatogenesis<br>(GO:0007283)                                | -0.2 | <i>Cd9, Dvl2, Eya1, Vangl2, Radil, Amn, Hk2, Eid2, Nav1, Sema6c, Jmjd6, Dnd1, citron, Morc1, Racgap1, Odf2</i>                                           |
| Male gamete generation<br>(GO:0048232)                         | -0.2 | <i>Cd9, Dvl2, Eya1, Vangl2, Radil, Amn, Hk2, Eid2, Nav1, Sema6c, Jmjd6, Dnd1, citron, Morc1, Racgap1, Odf2</i>                                           |
| Tube morphogenesis<br>(GO:003523)                              | -0.2 | <i>P2rx7, Pou2f1, Foxp4, Esrrb, Hnf1a, Dvl2, Vangl2, Epha2</i>                                                                                           |
| Morphogenesis of an epithelium<br>(GO:0002009)                 | -0.2 | <i>Jmjd6, Tns3, Esrrb, Epha2, Hnf1, Eya1, Vangl2, Dvl2</i>                                                                                               |
| Skeletal system development<br>(GO:0001501)                    | -0.2 | <i>P2rx7, Pou2f1, Foxp4, Esrrb, Hnf1a, Dvl2, Vangl2, Epha2</i>                                                                                           |
| Cell projection morphogenesis<br>(GO:0048858)                  | -0.2 | <i>Citron, Crocc, Cd9, Brsk1, Esrrb, P2rx7, Vangl2, Sema6c, Uchl1</i>                                                                                    |
| Cell morphogenesis involved in differentiation<br>(GO:0000904) | -0.1 | <i>Citron, Crocc, Cd9, Brsk1, Esrrb, P2rx7, Vangl2, Sema6c, Uchl1</i>                                                                                    |
| Cell part morphogenesis<br>(GO:0032990)                        | -0.1 | <i>Citron, Crocc, Cd9, Brsk1, Esrrb, P2rx7, Vangl2, Sema6c, Uchl1</i>                                                                                    |
| Cation transport<br>(GO:0006812)                               | -0.1 | <i>Vdac1, Vdac2, Cic3, Cacnb1, P2rx7, Sh3kbp1, Trsf, Atp5g2, Slc38a3, Slc25a12, Racgap1, Timm17b, Slc25a19, Osbp, Chmp7, Jakmip1, Tnp01, Apoc1, Nos1</i> |
| Metal ion transport<br>(GO:0030001)                            | -0.1 | <i>Vdac1, Vdac2, Cic3, Cacnb1, P2rx7, Sh3kbp1, Trsf, Atp5g2, Slc38a3, Slc25a12, Racgap1, Timm17b, Slc25a19, Osbp, Chmp7, Jakmip1, Tnp01, Apoc1, Nos1</i> |
| Epithelium development<br>(GO:0060429)                         | -0.1 | <i>Jmjd6, Tns3, Esrrb, Epha2, Hnf1, Eya1, Vangl2, Dvl2</i>                                                                                               |
